# Supplementary material for: Infrared matrix-assisted laser desorption electrospray ionization (IR-MALDESI) mass spectrometry imaging analysis of endogenous metabolites in cherry tomatoes
Source: Royal Society of Chemistry journal article supplement (doi:10.1039/d0an00818d), 2020-01-01
Supplement: d0an00818d1.xlsx [file d0an00818d1.xlsx]

## Sheet: Metabolites from Literature
# of Metabolites	Tomato Metabolites Found in 3 MS Studies Focused on Characterizing the Metabolome for Tomatoes				# of Formulas
159 metabolites were searched for in our data, 140 were found	This is the full metabolite list made by adding up the metabolites found in the 3 studies referenced above and in the paper as sources 19, 43, 44 (i.e. Literature Driven identifications). The metabolites in this list were searched for in our data by using their associated m/z values. Detected metabolites and the m/z they were found at are bolded.	m/z [M+H+]+	m/z [M+H+ -H2O]+	Formula	115 formulas were searched for in our data, 97 were found
1	Ferulic acid	195.065	177.055	C10H10O4	1
2	tryptophan	205.097	187.087	C11H12N2O2	2
3	Sinapic acid	225.076	207.065	C11H12O5	3
4	isomaltose	343.123	325.113	C12H22O11	4
5	maltose	343.123	325.113
6	sucrose	343.123	325.113
7	trehalose	343.123	325.113
8	maltitol	345.139	327.129	C12H24O11	5
9	Hydroxybenzoic acid-hexose	301.092	283.081	C13H16O8	6
10	Kaempferol	287.055		C15H10O6	7
11	Quercetin	303.05		C15H10O7	8
12	Naringenin	273.076	255.065	C15H12O5	9
13	Naringenin (S)	273.076	255.065
14	Naringenin chalcone	273.076	255.065
15	Naringenin chalcone (S)	273.076	255.065
16	Caffeic acid-hexose I	343.102	325.092	C15H18O10	10
17	Caffeic acid-hexose II	343.102	325.092	C15H18O11	11
18	Caffeic acid-hexose III	343.102	325.092	C15H18O12	12
19	Caffeic acid-hexose IV	343.102	325.092	C15H18O13	13
20	Caffeic acid-hexose V	343.102	325.092	C15H18O14	14
21	Caffeic acid-hexose VI	343.102	325.092	C15H18O15	15
22	Coumaric acid-hexose I	327.107	309.097	C15H18O8	16
23	Coumaric acid-hexose II	327.107	309.097
24	p-Coumaric acid-O-β-d-glucoside	327.107	309.097
25	Caffeic acid-4-O-β-d-glucoside	343.102	325.092	C15H18O9	17
26	p-Coumaroylquinic acid	339.107		C16H18O8	18
27	3-Caffeoylquinic acid	355.102	337.092	C16H18O9	19
28	4-Caffeoylquinic acid	355.102	337.092
29	4-O-Caffeoylquinic acid	355.102	337.092
30	5-Caffeoylquinic acid (S)	355.102	337.092
31	5-O-Caffeoylquinic acid	355.102	337.092
32	Chlorogenic acid (3-O-caffeoylquinic acid)	355.102	337.092
33	Ferulic acid-hexose I	357.118	339.107	C16H20O9	20
34	Ferulic acid-hexose II	357.118	339.107
35	Ferulic acid-O-β-d-glucoside	357.118	339.107
36	Pantothenic acid-hexose	382.171	364.16	C16H23N5O6	21
37	FA16_0	257.248	239.237	C16H32O2	22
38	melezitose	505.176	487.166	C18H32O16	23
39	FA18_2	281.248	263.237	C18H32O2	24
40	FA18_0	285.279	267.268	C18H36O2	25
41	Astragalin	449.108		C21H20O11	26
42	Isoquercitrin	465.103	447.092	C21H20O12	27
43	Myricitrin	465.103	447.092
44	Naringenin chalcone-glucoside	435.129	417.118	C21H22O10	28
45	Naringenin chalcone-hexose I	435.129	417.118
46	Naringenin chalcone-hexose II	435.129	417.118
47	Naringenin-7-O-glucoside	435.129	417.118
48	Dihydrokaempferol-7-O-hexoside and Dihydrokaempferol-?-O-hexoside	451.123		C21H22O11	29
49	Dicaffeoylquinic acid I	517.134	499.123	C25H24O12	30
50	Dicaffeoylquinic acid II	517.134	499.123
51	Dicaffeoylquinic acid III	517.134	499.123
52	Kaempferol-3-O-rutinoside	595.166	577.155	C27H30O15	31
53	Kaempferol-Glc-rhamnose (S)	595.166	577.155
54	Kaempferol-3-7-di-O-glucoside	611.161	593.15	C27H30O16	32
55	Quercetin-Glc-rhamnose (S)	611.161	593.15
56	Rutin	611.161	593.15
57	Naringin		563.176	C27H32O14	33
58	Naringenin chalcone-dihexose or Naringenin-dihexose	597.181		C27H32O15	34
59	Tomatidenol	414.337	396.326	C27H43N1O2	35
60	Tomatidine	416.352	398.342	C27H45N1O2	36
61	a-tocopherol	431.388	413.378	C29H50O2	37
62	Quercetin-3-O-trisaccharide	743.203	725.192	C32H38O20	38
63	Quercetin-hexose-deoxyhexose-pentose	743.203	725.192
64	Quercetin-dihexose-deoxyhexose		755.203	C33H40O21	39
65	δ-Tomatine	578.405	560.395	C33H55N1O7	40
66	Petunidin-3-O-rutinoside-5-O-glucoside	788.237		C34H43O21	41
67	γ-Tomatine	740.458		C39H65NO12	42
68	cysteine	122.027		C3H7N1O2S1	43
69	serine	106.05		C3H7NO3	44
70	glycerate-3-P	187	168.99	C3H7O7P	45
71	glycerol-3-P	173.021	155.01	C3H9O6P	46
72	Delphinidin-3-O-(p-coumaroyl)rutinoside-5-O-glucoside	920.258		C42H47O23	47
73	Petunidin-3-O-(p-coumaroyl)rutinoside-5-O-glucoside		916.263	C43H49O23	48
74	β-Tomatine	902.511		C45H75N1O17	49
75	erythritol	123.065	105.055	C4H10O4	50
76	uracil	113.035		C4H4N2O2	51
77	fumarate	117.018		C4H4O4	52
78	maleate	117.018
79	succinate	119.034	101.023	C4H6O4	53
80	malate	135.029	117.018	C4H6O5	54
81	aspartate	134.045	116.034	C4H7NO4	55
82	asparagine	133.061	115.05	C4H8N2O3	56
83	threonate		119.034	C4H8O5	57
84	GABA	104.071		C4H9N1O2	58
85	S-me-cysteine	136.043	118.032	C4H9N1O2S1	59
86	homoserine	120.066	102.055	C4H9N1O3	60
87	threonine	120.066	102.055
88	Dehydrotomatine	1032.54		C50H81NO21	61
89	α-Tomatine	1034.55		C50H83N1O21	62
90	Lycoperoside H	1050.55	1032.54	C50H83NO22	63
91	Lycoperoside A	1092.56	1074.55	C52H85NO23	64
92	Lycoperoside B	1092.56	1074.55
93	Lycoperoside C	1092.56	1074.55
94	(Lycoperoside C) FA or (Lycoperoside B) FA or (Lycoperoside A) FA3		1120.55	C53H87NO25	65
95	glutamine	147.076	129.066	C5H10N2O3	66
96	arabinose	151.06	133.05	C5H10O5	67
97	ribose	151.06	133.05
98	valine	118.086		C5H11N1O2	68
99	methionine	150.058	132.048	C5H11N1O2S1	69
100	oxoproline-5	130.05		C5H7NO3	70
101	citramalate		131.034	C5H8O5	71
102	proline	116.071		C5H9N1O2	72
103	t-4-HO-proline	132.066	114.055	C5H9N1O3	73
104	glutamate	148.06	130.05	C5H9N1O4	74
105	saccharate		193.034	C6H10O8	75
106	fucose	165.076	147.065	C6H12O5	76
107	rhamnose	165.076	147.065
108	fructose	181.071	163.06	C6H12O6	77
109	galactose	181.071	163.06
110	glucose	181.071	163.06
111	inositol	181.071	163.06
112	mannose	181.071	163.06
113	gluconate		179.055	C6H12O7	78
114	isoleucine	132.102	114.091	C6H13N1O2	79
115	leucine	132.102	114.091
116	fructose-6-P	261.037	243.026	C6H13O9P1	80
117	glucose-6-P	261.037	243.026
118	inositol-1-P	261.037	243.026
119	lysine	147.113	129.102	C6H14N2O2	81
120	arginine	175.119	157.108	C6H14N4O2	82
121	mannitol	183.086	165.076	C6H14O6	83
122	sorbitol	183.086	165.076
123	aconitate	175.024	157.013	C6H6O6	84
124	dehydroascorbate	175.024	157.013
125	L-ascorbate	177.039	159.029	C6H8O6	85
126	citrate	193.034	175.024	C6H8O7	86
127	isocitrate	193.034	175.024
128	galacturonate		177.039	C6H9O7	87
129	shikimate	175.06	157.05	C7H10O5	88
130	quinate	193.071	175.06	C7H12O6	89
131	p-Hydroxybenzoic acid	139.039	121.028	C7H6O3	90
132	Salicylic acid	139.039	121.028
133	Protocatechuic acid	155.034	137.023	C7H6O4	91
134	Vanillic acid	169.05	151.039	C8H8O4	92
135	phenylalanine	166.086	148.076	C9H11N1O2	93
136	tyrosine	182.081	164.071	C9H11N1O3	94
137	Cinnamic acid		131.049	C9H8O2	95
138	m-Coumaric acid	165.055	147.044	C9H8O3	96
139	p-Coumaric acid	165.055	147.044
140	Caffeic acid	181.05	163.039	C9H8O4	97
141	Myricetin	319.045	301.034	C15H10O8	98
142	Feruloylquinic acid	369.118	351.107	C17H20O9	99
143	Benzyl alcohol-hexose-pentose	403.16	385.149	C18H26O10	100
144	Benzyl alcohol-dihexose	433.17	415.16	C19H28O11	101
145	Kaempferol-3-O-rutinoside-7-O-glucoside	757.219	739.208	C33H40O20	102
146	Delphinidin-3-O-rutinoside-5-O-glucoside	774.221	756.211	C33H41O21	103
147	Tricaffeoylquinic acid I	679.166	661.155	C34H30O15	104
148	Tricaffeoylquinic acid II	679.166	661.155
149	Malvidin-3-O-rutinoside-5-O-glucoside	802.253	784.242	C35H45O21	105
150	p-Coumaric acid-rutin conjugate	757.197	739.187	C36H36O18	106
151	glycerate	107.034	89.0233	C3H6O4	107
152	Quercetin-hexose-deoxyhexose-pentose-p-coumaric acid	889.24	871.229	C41H44O22	108
153	Delphinidin-3-O-(caffeoyl)rutinoside-5-O-glucoside	936.253	918.242	C42H47O24	109
154	Petunidin-3-(caffeoyl)rutinoside-5-O-glucoside	950.269	932.258	C43H49O24	110
155	Malvidin-3-O-(p-coumaroyl)rutinoside-5-O-glucoside	948.289	930.279	C44H51O23	111
156	Malvidin-3-(caffeoyl)rutinoside-5-O-glucoside	964.284	946.274	C44H51O24	112
157	(α-Tomatine) FA (S)	1080.56	1062.55	C51H85NO23	113
158	(Lycoperoside H) FA	1096.55	1078.54	C51H85NO24	114
159	benzoate	122.036	104.026	C7H6O2	115

## Sheet: Metabolites from TomatoCyc
#	# of Metabolites	Full List of Tomato Metabolites Extracted from the TomatoCyc Database in the m/z range 100-1200				# of Formulas
	2649 metabolites were searched for in our data, 788 were found that had not been found before, 190 were found both in the tomatocyc data and previous MS Studies	This is the full metabolite list from TomatoCyc for all metabolites that fell within the m/z range we interrogated (2649 metabolites). Each of the metabolites in this list were searched for in our data by using their associated m/z values. Detected metabolites and the m/z they were found at are bolded. Those that were found in previous MS studies as well are underlined, too.	m/z [M+H+]+	m/z [M+H+ -H2O]+	Formula	1626 formulas were searched for in our data, 546 were found , 54 of which were found in previous MS studies
1	1	cis-zeatin	220.119	202.109	C10H13N5O1	1
2	2	trans-zeatin	220.119	202.109
3	3	2'-deoxyadenosine	252.109	234.099	C10H13N5O3	2
4	4	5'-deoxyadenosine	252.109	234.099
5	5	2'-deoxyguanosine	268.104	250.093	C10H13N5O4	3
6	6	adenosine	268.104	250.093
7	7	a glutathione group	307.083	289.073	C10H16N3O6S1	4
8	8	glutathione	307.083	289.073
9	9	10-hydroxydecanoate	188.141	170.13	C10H19O3	5
10	10	3-hydroxydecanoate	188.141	170.13
11	11	7-hydroxy-8-methoxycoumarin	193.05	175.039	C10H8O4	6
12	12	isoscopoletin	193.05	175.039
13	13	scopoletin	193.05	175.039
14	14	primeverose	313.113	295.102	C11H20O10	7
15	15	vicianose	313.113	295.102
16	16	β-D-apiofuranosyl-(1->6)-D-glucose	313.113	295.102
17	17	1-(2-carboxyphenylamino)-1-deoxy-D-ribulose 5-phosphate	347.04	329.03	C12H13N1O9P1	8
18	18	N-(5-phosphoribosyl)-anthranilate	347.04	329.03
19	19	(-)-jasmonate	210.125	192.114	C12H17O3	9
20	20	(+)-7-epi-jasmonate	210.125	192.114
21	21	a jasmonate	210.125	192.114
22	22	an 11-hydroxyjasmonate	226.12	208.109	C12H17O4	10
23	23	cis-tuberonic acid	226.12	208.109
24	24	trans-tuberonic acid	226.12	208.109
25	25	tuberonic acid	226.12	208.109
26	26	(9Z)-12-oxo-dodec-9-enoate	212.141	194.13	C12H19O3	11
27	27	traumatin	212.141	194.13
28	28	D-cellobiose 6'-phosphate	421.074	403.064	C12H21O14P1	12
29	29	D-trehalose 6-phosphate	421.074	403.064
30	30	lactose 6'-phosphate	421.074	403.064
31	31	maltose 6'-phosphate	421.074	403.064
32	32	sucrose 6F-phosphate	421.074	403.064
33	33	α,α-trehalose 6-phosphate	421.074	403.064
34	34	8-methoxypsoralen	217.05	199.039	C12H8O4	13
35	35	bergapten	217.05	199.039
36	36	4-(β-D-glucosyloxy)benzoate	300.084	282.073	C13H15O8	14
37	37	salicylate 2-O-β-D-glucoside	300.084	282.073
38	38	anthraniloyl-O-glucopyranose	300.108	282.097	C13H17N1O7	15
39	39	p-aminobenzoate-β-D-glucopyranosyl ester	300.108	282.097
40	40	guaiacol O-β-D-glucopyranoside	287.113	269.102	C13H18O7	16
41	41	salicin	287.113	269.102
42	42	(+)-columbianetin	247.096	229.086	C14H14O4	17
43	43	(+)-marmesin	247.096	229.086
44	44	β-D-galactopyranosyl-(1->3)-N-acetyl-D-glucosamine	384.15	366.139	C14H25N1O11	18
45	45	β-D-galactosyl-(1→3)-N-acetyl-D-galactosamine	384.15	366.139
46	46	(3R,4R)-7,2',4'-trihydroxyisoflavanol	275.091	257.081	C15H14O5	19
47	47	phloretin	275.091	257.081
48	48	3-O-β-D-glucosyl-daphnetin	341.087	323.076	C15H16O9	20
49	49	3-O-β-D-glucosyl-esculetin	341.087	323.076
50	50	4-O- β -D-glucosyl-daphnetin	341.087	323.076
51	51	4-O-β-D-glucosyl-esculetin	341.087	323.076
52	52	daphnetin-8-glucoside	341.087	323.076
53	53	esculin	341.087	323.076
54	54	2-O-(β-D-glucosyl)-2-hydroxycinnamate	326.1	308.089	C15H17O8	21
55	55	4-O-β-D-glucosyl-4-hydroxycinnamate	326.1	308.089
56	56	cis-coumarinic acid-β-D-glucoside	326.1	308.089
57	57	2-cis-abscisate	264.136	246.125	C15H19O4	22
58	58	2-trans-abscisate	264.136	246.125
59	59	1-(5-phospho-β-D-ribosyl)-5-[(5-phosphoribosylamino)methylideneamino]imidazole-4-carboxamide	574.058	556.048	C15H21N5O15P2	23
60	60	phosphoribulosylformimino-AICAR-phosphate	574.058	556.048
61	61	cis-zeatin riboside	352.162	334.151	C15H21N5O5	24
62	62	O-β-D-xylosylzeatin	352.162	334.151
63	63	trans-zeatin riboside	352.162	334.151
64	64	6α-hydroxy-germacra-1(10),4,11(13)-trien-12-oate	250.156	232.146	C15H21O3	25
65	65	8α-hydroxy-germacra-1(10),4,11(13)-trien-12-oate	250.156	232.146
66	66	8β-hydroxy-germacra-1(10),4,11(13)-trien-12-oate	250.156	232.146
67	67	(1E,4S,5E,7R)-germacra-1(10),5-dien-11-ol	223.206	205.195	C15H26O1	26
68	68	(2E,6E)-farnesol	223.206	205.195
69	69	(3R,6E)-nerolidol	223.206	205.195
70	70	(3S,6E)-nerolidol	223.206	205.195
71	71	(E)-nerolidol	223.206	205.195
72	72	a farnesol	223.206	205.195
73	73	(3R)-sophorol	301.071	283.06	C16H12O6	27
74	74	3-O-methylkaempferol	301.071	283.06
75	75	scutellarein 7-methyl ether	301.071	283.06
76	76	(2S)-sakuranetin	287.091	269.081	C16H14O5	28
77	77	(3R)-vestitone	287.091	269.081
78	78	(3R,4R)-3-(6-hydroxy-1,3-benzodioxol-5-yl)-3,4-dihydro-2H-chromene-4,7-diol	303.086	285.076	C16H14O6	29
79	79	carthamidin-7-methyl ether	303.086	285.076
80	80	(4aR,10bS)-noroxomaritidine	272.128	254.118	C16H17N1O3	30
81	81	(4aS,10bR)-noroxomaritidine	272.128	254.118
82	82	N-demethylnarwedine	272.128	254.118
83	83	noroxomaritidine	272.128	254.118
84	84	4'-O-methylnorbelladine	274.144	256.133	C16H19N1O3	31
85	85	normaritidine	274.144	256.133
86	86	oxomaritinamine	274.144	256.133
87	87	kinetin-7-N-glucoside	378.141	360.13	C16H19N5O6	32
88	88	kinetin-9-N-glucoside	378.141	360.13
89	89	isopentenyladenine-7-N-glucoside	366.177	348.167	C16H23N5O5	33
90	90	isopentenyladenine-9-N-glucoside	366.177	348.167
91	91	cis-zeatin-7-N-glucoside	382.172	364.162	C16H23N5O6	34
92	92	cis-zeatin-9-N-glucoside	382.172	364.162
93	93	cis-zeatin-O-glucoside	382.172	364.162
94	94	trans-zeatin-7-N-glucoside	382.172	364.162
95	95	trans-zeatin-9-N-glucoside	382.172	364.162
96	96	trans-zeatin-O-glucoside	382.172	364.162
97	97	a methyl farnesoate	251.201	233.19	C16H26O2	35
98	98	Triton X-100	251.201	233.19
99	99	16-oxo-palmitate	270.219	252.208	C16H29O3	36
100	100	3-oxo-palmitate	270.219	252.208
101	101	3,4'-dimethylkaempferol	315.086	297.076	C17H14O6	37
102	102	7,4'-dimethylkaempferol	315.086	297.076
103	103	cirsimaritin	315.086	297.076
104	104	ladanein	315.086	297.076
105	105	3,3'-dimethylquercetin	331.081	313.071	C17H14O7	38
106	106	3,7-dimethylquercetin	331.081	313.071
107	107	7,3'-dimethylquercetin	331.081	313.071
108	108	7,4'-dimethylquercetin	331.081	313.071
109	109	an cis-hinokiresinol	253.122	235.112	C17H16O2	39
110	110	an trans-hinokiresinol	253.122	235.112
111	111	(S)-coclaurine	287.152	269.141	C17H20N1O3	40
112	112	morphine	287.152	269.141
113	113	(S)-6-O-methylnorlaudanosoline	303.147	285.136	C17H20N1O4	41
114	114	6-O-methylnorlaudanosoline	303.147	285.087
115	115	erythro-guaiacylglycerol-β-guaiacyl ether	321.133	303.123	C17H20O6	42
116	116	guaiacylglycerol-β-guaiacyl ether	321.133	303.123
117	117	threo-guaiacylglycerol-β-guaiacyl ether	321.133	303.123
118	118	UDP-N-acetyl-D-galactosamine	606.073	588.063	C17H25N3O17P2	43
119	119	UDP-N-acetyl-D-glucosamine	606.073	588.063
120	120	UDP-N-acetyl-α-D-galactosamine	606.073	588.063
121	121	UDP-N-acetyl-α-D-glucosamine	606.073	588.063
122	122	3',4',5'-trimethylmyricetin	361.092	343.081	C18H16O8	44
123	123	7,3',5'-trimethylmyricetin	361.092	343.081
124	124	hydratedusnate	361.092	343.081
125	125	codeinone	299.152	281.141	C18H20N1O3	45
126	126	neopinone	299.152	281.141
127	127	benzyladenine-7-N-glucoside	388.162	370.151	C18H21N5O5	46
128	128	benzyladenine-9-N-glucoside	388.162	370.151
129	129	(S)-3'-hydroxy-N-methylcoclaurine	317.162	299.152	C18H22N1O4	47
130	130	(S)-norreticuline	317.162	299.152
131	131	norreticuline	317.162	299.152
132	132	cis-tuberonic acid glucoside	388.173	370.162	C18H27O9	48
133	133	tuberonic acid glucoside	388.173	370.162
134	134	(-)-jasmonoyl-L-isoleucine	323.209	305.199	C18H28N1O4	49
135	135	(+)-7-epi-jasmonoyl-L-isoleucine	323.209	305.199
136	136	a jasmonoyl-L-isoleucine	323.209	305.199
137	137	a jasmonoyl-L-leucine	323.209	305.199
138	138	(12Z,15Z)-9,10-epoxyoctadeca-12,15-dienoate	294.219	276.208	C18H29O3	50
139	139	(9Z,12Z)-15,16-epoxyoctadeca-9,12-dienoate	294.219	276.208
140	140	(9Z,15Z)-12,13-epoxy-octadeca-9,15-dienoate	294.219	276.208
141	141	8-[(1R,2R)-3-oxo-2-{(Z)-pent-2-enyl}cyclopentyl]octanoate	294.219	276.208
142	142	9,10-epoxy-10,12Z-octadecadienoate	294.219	276.208
143	143	colneleate	294.219	276.208
144	144	13(S)-HPOTE	310.214	292.203	C18H29O4	51
145	145	9(R)-HPOTE	310.214	292.203
146	146	9(S)-HPOTE	310.214	292.203
147	147	2-R-hydroperoxy-linolenate	311.222	293.211	C18H30O4	52
148	148	α,ω-9Z-octadecenedioate	311.222	293.211
149	149	carlactone carboxylate	332.162	314.151	C19H23O5	53
150	150	gibberellin A20	332.162	314.151
151	151	gibberellin A4	332.162	314.151
152	152	(-)-matairesinol	359.149	341.138	C20H22O6	54
153	153	(-)-pinoresinol	359.149	341.138
154	154	(+)-pinoresinol	359.149	341.138
155	155	dehydrodiconiferyl alcohol	359.149	341.138
156	156	pinoresinol	359.149	341.138
157	157	a retinal	285.221	267.211	C20H28O1	55
158	158	all-trans-retinal	285.221	267.211
159	159	a retinol	287.237	269.226	C20H30O1	56
160	160	abieta-7,13-diene-18-al	287.237	269.226
161	161	all-trans-retinol	287.237	269.226
162	162	ent-kaurenal	287.237	269.226
163	163	(5Z)-(15S)-11-α-hydroxy-9,15-dioxoprostanoate	352.224	334.214	C20H31O5	57
164	164	prostaglandin E2	352.224	334.214
165	165	prostaglandin-H2	352.224	334.214
166	166	thromboxane A2	352.224	334.214
167	167	(-)-4'-demethyl-deoxypodophyllotoxin	385.128	367.118	C21H20O7	58
168	168	(-)-4'-demethyl-epipodophyllotoxin	401.123	383.113	C21H20O8	59
169	169	a flavonol 3-O-galactoside	401.123	383.113
170	170	(+)-7-epi-jasmonoyl-L-phenylalanine	357.193	339.183	C21H26N1O4	60
171	171	a jasmonoyl-L-phenylalanine	357.193	339.183
172	172	geranyl 6-O-β-D-xylopyranosyl-β-D-glucopyranoside	449.238	431.228	C21H36O10	61
173	173	linalyl 6-O-α-L-arabinopyranosyl- β-D-glucopyranoside	449.238	431.228
174	174	linalyl 6-O-β-D-xylopyranosyl-β-D-glucopyranoside	449.238	431.228
175	175	6G,6-kestotetraose	667.229	649.219	C24H42O21	62
176	176	maltotetraose	667.229	649.219
177	177	stachyose	667.229	649.219
178	178	(3S,5R,6R)-3,5-dihydroxy-6,7-didehydro-5,6-dihydro-12'-apo-β-caroten-12'-al	383.258	365.248	C25H34O3	63
179	179	(3S,5R,6S)-5,6-epoxy-3-hydroxy-5,6-dihydro-12'-apo-β-caroten-12'-al	383.258	365.248
180	180	9-cis-10'-apo-β-carotenal	377.284	359.273	C27H36O1	64
181	181	all-trans-10'-apo-β-carotenal	377.284	359.109
182	182	2-methyl-6-geranylgeranyl-1,4-benzoquinol	397.31	379.3	C27H40O2	65
183	183	δ-tocotrienol	397.31	379.3
184	184	solasod-4-en-3-one	412.321	394.31	C27H41N1O2	66
185	185	tomatid-4-en-3-one	412.321	394.31
186	186	5α-cholesta-7,24-dien-3-one	383.331	365.32	C27H42O1	67
187	187	7-dehydrodesmosterol	383.331	365.32
188	188	zymosterone	383.331	365.32
189	189	5α-cholesta-7,24-dien-3β-ol	385.346	367.336	C27H44O1	68
190	190	5α-cholesta-8-en-3-one	385.346	367.336
191	191	7-dehydrocholesterol	385.346	367.336
192	192	cholest-4-en-3-one	385.346	367.336
193	193	cholest-5-en-3-one	385.346	367.336
194	194	desmosterol	385.346	367.336
195	195	lathosterone	385.346	367.336
196	196	zymosterol	385.346	367.336
197	197	5β-cholestan-3-one	387.362	369.352	C27H46O1	69
198	198	cholesterol	387.362	369.352
199	199	lathosterol	387.362	369.352
200	200	(22R)-hydroxycholesterol	403.357	385.346	C27H46O2	70
201	201	2-methyl-6-phytyl-1,4-benzoquinol	403.357	385.346
202	202	δ-tocopherol	403.357	385.346
203	203	2,3-dimethyl-6-geranylgeranyl-1,4-benzoquinol	411.326	393.315	C28H42O2	71
204	204	β-tocotrienol	411.326	393.315
205	205	γ-tocotrienol	411.326	393.315
206	206	3-dehydro-4-methylzymosterol	397.346	379.336	C28H44O1	72
207	207	4α-methyl-5α-cholesta-8,14,24-trien-3β-ol	397.346	379.336
208	208	episterone	397.346	379.336
209	209	ergosta-5,7,24(28)-trien-3β-ol	397.346	379.336
210	210	24-methyldesmosterol	399.362	381.352	C28H46O1	73
211	211	24-methylenecholesterol	399.362	381.352
212	212	4α-methyl-5α-cholesta-7,24-dien-3β-ol	399.362	381.352
213	213	4α-methyl-5α-cholesta-8,24-dien-3β-ol	399.362	381.352
214	214	4α-methyl-5α-cholesta-8-en-3-one	399.362	381.352
215	215	4α-methyl-cholesta-8,14-dienol	399.362	381.352
216	216	brassicasterol	399.362	381.352
217	217	campest-4-en-3-one	399.362	381.352
218	218	crinosterol	399.362	381.352
219	219	episterol	399.362	381.352
220	220	ergosta-5,7-dienol	399.362	381.352
221	221	fecosterol	399.362	381.352
222	222	(22α)-hydroxy-campest-4-en-3-one	415.357	397.346	C28H46O2	74
223	223	4α-hydroxymethyl-5α-cholesta-7,24-dien-3β-ol	415.357	397.346
224	224	(5α)-campestan-3-one	401.378	383.367	C28H48O1	75
225	225	24-epi-campesterol	401.378	383.367
226	226	4α-methyl-5α-cholest-7-en-3β-ol	401.378	383.367
227	227	4α-methyl-5α-cholesta-8-en-3-ol	401.378	383.367
228	228	campest-4-en-3β-ol	401.378	383.367
229	229	campesterol	401.378	383.367
230	230	ergost-7-enol	401.378	383.367
231	231	(22S,24R)-22-hydroxy-5α-ergostan-3-one	417.373	399.362	C28H48O2	76
232	232	(22α)-hydroxy-campesterol	417.373	399.362
233	233	2,3-dimethyl-6-phytyl-1,4-benzoquinol	417.373	399.362
234	234	6-oxocampestanol	417.373	399.362
235	235	β-tocopherol	417.373	399.362
236	236	γ-tocopherol	417.373	399.362
237	237	(22R,23R)-22,23-dihydroxycampesterol	433.368	415.357	C28H48O3	77
238	238	3-dehydro-6-deoxoteasterone	433.368	415.357
239	239	cathasterone	433.368	415.357
240	240	3-dehydro-6-hydroxyteasterone	449.363	431.352	C28H48O4	78
241	241	teasterone	449.363	431.352
242	242	typhasterol	449.363	431.352
243	243	7-oxateasterone	465.357	447.347	C28H48O5	79
244	244	7-oxatyphasterol	465.357	447.347
245	245	castasterone	465.357	447.347
246	246	4α,14α-dimethyl-9β,19-cyclo-5α-cholest-24-en-3-one	411.362	393.352	C29H46O1	80
247	247	4α-methyl-5α-ergosta-8,14,24(28)-trien-3β-ol	411.362	393.352
248	248	5-dehydroavenasterol	411.362	393.352
249	249	avenastenone	411.362	393.352
250	250	(22α)-hydroxy-isofucosterol	429.373	411.362	C29H48O2	81
251	251	3β-hydroxy-4β-methyl-5α-cholest-7-ene-4α-carbaldehyde	429.373	411.362
252	252	4α-hydroxymethyl-ergosta-7,24(241)-dien-3β-ol	429.373	411.362
253	253	31-norcycloartanol	415.393	397.383	C29H50O1	82
254	254	4,4-dimethyl-5α-cholest-7-en-3β-ol	415.393	397.383
255	255	4,4-dimethyl-5α-cholesta-8-en-3β-ol	415.393	397.383
256	256	4α,14α-dimethyl-cholesta-8-enol	415.393	397.383
257	257	sitosterol	415.393	397.383
258	258	cyanidin 3-(p-coumaroyl)-glucoside	594.137	576.126	C30H25O13	83
259	259	cyanidin 3-O-β-D-p-coumaroylglucoside	594.137	576.126
260	260	pelargonidin 3-O-β-D-caffeoylglucoside	594.137	576.126
261	261	11-oxo-β-amyrin	441.373	423.362	C30H48O2	84
262	262	30-oxoobtusifoliol	441.373	423.362
263	263	4α-formyl,4β,14α-dimethyl-9β,19-cyclo-5α-cholest-24-en-3β-ol	441.373	423.362
264	264	4α-formyl-stigmasta-7,24(241)-dien-3β-ol	441.373	423.362
265	265	betulinic aldehyde	441.373	423.362
266	266	oleanolic aldehyde	441.373	423.362
267	267	ursolic aldehyde	441.373	423.362
268	268	30-hydroxy-11-oxo-β-amyrin	457.368	439.357	C30H48O3	85
269	269	ursolate	457.368	439.357
270	270	(3S)-2,3-epoxy-2,3-dihydrosqualene	427.393	409.383	C30H50O1	86
271	271	24-ethylidenelophenol	427.393	409.383
272	272	cycloartenol	427.393	409.383
273	273	cycloeucalenol	427.393	409.383
274	274	friedelin	427.393	409.383
275	275	germanicol	427.393	409.383
276	276	glutinol	427.393	409.383
277	277	isomultiflorenol	427.393	409.383
278	278	lupeol	427.393	409.383
279	279	multiflorenol	427.393	409.383
280	280	obtusifoliol	427.393	409.383
281	281	taraxerol	427.393	409.383
282	282	thalianol	427.393	409.383
283	283	α-amyrin	427.393	409.383
284	284	β-amyrin	427.393	409.383
285	285	δ-amyrin	427.393	409.383
286	286	30-hydroxyobtusifoliol	443.388	425.378	C30H50O2	87
287	287	30-hydroxy-β-amyrin	443.388	425.378
288	288	4α-hydroxymethyl,4β,14α-dimethyl-9β,19-cyclo-5α-cholest-24-en-3β-ol	443.388	425.378
289	289	4α-hydroxymethyl-stigmasta-7,24(241)-dien-3β-ol	443.388	425.378
290	290	7β-hydroxythalianol	443.388	425.378
291	291	betulin	443.388	425.378
292	292	erythrodiol	443.388	425.378
293	293	uvaol	443.388	425.378
294	294	(3E)-phytochromobilin	583.255	565.245	C33H34N4O6	88
295	295	(3Z)-phytochromobilin	583.255	565.245
296	296	(Z,Z)-bilirubin-IX α	583.255	565.245
297	297	a phytochromobilin	583.255	565.245
298	298	solasodine 3-O-β-D-galactoside	576.389	558.379	C33H53N1O7	89
299	299	solasodine 3-O-β-D-glucoside	576.389	558.379
300	300	9-cis-β-carotene	537.445	519.435	C40H56	90
301	301	all-trans-lycopene	537.445	519.435
302	302	prolycopene	537.445	519.435
303	303	α-carotene	537.445	519.435
304	304	β-carotene	537.445	519.435
305	305	γ-carotene	537.445	519.435
306	306	δ-carotene	537.445	519.435
307	307	zeinoxanthin	553.44	535.43	C40H56O1	91
308	308	α-cryptoxanthin	553.44	535.43
309	309	β-cryptoxanthin	553.44	535.43
310	310	lutein	569.435	551.425	C40H56O2	92
311	311	zeaxanthin	569.435	551.425
312	312	9'-cis-neoxanthin	601.425	583.415	C40H56O4	93
313	313	9-cis-violaxanthin	601.425	583.415
314	314	trans-neoxanthin	601.425	583.415
315	315	violaxanthin	601.425	583.415
316	316	9,15,9'-tri-cis-ζ-carotene	541.477	523.466	C40H60	94
317	317	9,9'-di-cis-ζ-carotene	541.477	523.466
318	318	1-linoleoyl-2-(3E)-hexadecenoyl-phosphatidylglycerol	744.494	726.483	C40H72O10P1	95
319	319	1-α-linolenoyl-2-palmitoyl-phosphatidylglycerol	744.494	726.483
320	320	1-linoleoyl-2-palmitoyl-phosphatidylglycerol	746.509	728.499	C40H74O10P1	96
321	321	1-oleoyl-2-(3E)-hexadecenoyl-phosphatidylglycerol	746.509	728.499
322	322	1-linoleoyl-2-α-linolenoyl-phosphatidylcholine	780.554	762.543	C44H78N1O8P1	97
323	323	1-α-linolenoyl-2-linoleoyl-phosphatidylcholine	780.554	762.543
324	324	1-linoleoyl-2-linoleoyl-phosphatidylcholine	782.569	764.559	C44H80N1O8P1	98
325	325	1-oleoyl-2-α-linolenoyl-phosphatidylcholine	782.569	764.559
326	326	1-α-linolenoyl-2-oleoyl-phosphatidylcholine	782.569	764.559
327	327	1-linoleoyl-2-oleoyl-phosphatidylcholine	784.585	766.575	C44H82N1O8P1	99
328	328	1-oleoyl-2-linoleoyl-phosphatidylcholine	784.585	766.575
329	329	(R)-methylmalonate-semialdehyde	102.031	84.0206	C4H5O3	100
330	330	(S)-methylmalonate-semialdehyde	102.031	84.0206
331	331	2-oxobutanoate	102.031	84.0206
332	332	acetoacetate	102.031	84.0206
333	333	methylmalonate semialdehyde	102.031	84.0206
334	334	succinate semialdehyde	102.031	84.0206
335	335	(S)-(+)-allantoin	159.051	141.041	C4H6N4O3	101
336	336	allantoin	159.051	141.041
337	337	3-ureidopropanoate	132.053	114.042	C4H7N2O3	102
338	338	N-carbamoylsarcosine	132.053	114.042
339	339	a plastoquinol	751.639	733.628	C53H82O2	103
340	340	plastoquinol-9	751.639	733.628
341	341	2'-deoxyribose	135.065	117.055	C5H10O4	104
342	342	nt-pentose-ring	135.065	117.055
343	343	L-methionine S-oxide	166.053	148.043	C5H11N1O3S1	105
344	344	L-methionine-(R)-S-oxide	166.053	148.043
345	345	L-methionine-(S)-S-oxide	166.053	148.043
346	346	methionine S-oxide	166.053	148.043
347	347	a pentitol	153.076	135.065	C5H12O5	106
348	348	L-arabinitol	153.076	135.065
349	349	xylitol	153.076	135.065
350	350	purine	121.051	103.04	C5H4N4	107
351	351	purine-ring	121.051	103.04
352	352	adenine	136.062	118.051	C5H5N5	108
353	353	adenine-ring	136.062	118.051
354	354	guanine	152.057	134.046	C5H5N5O1	109
355	355	isoguanine	152.057	134.046
356	356	(R)-2-hydroxyglutarate	147.029	129.018	C5H6O5	110
357	357	(S)-2-hydroxyglutarate	147.029	129.018
358	358	2-hydroxyglutarate	147.029	129.018
359	359	citramalate	147.029	129.018
360	360	dehydro-D-arabinono-1,4-lactone	147.029	129.018
361	361	(2R)-2,3-dihydroxy-3-methylbutanoate	134.057	116.047	C5H9O4	111
362	362	2,3-dihydroxy-3-methylbutanoate	134.057	116.047
363	363	1-deoxy-D-xylulose 5-phosphate	213.016	195.005	C5H9O7P1	112
364	364	2-deoxy-D-ribose 5-phosphate	213.016	195.005
365	365	deoxyribose 1-phosphate	213.016	195.005
366	366	aldehydo-D-arabinose 5-phosphate	229.011	211	C5H9O8P1	113
367	367	aldehydo-D-ribose 5-phosphate	229.011	211
368	368	D-arabinofuranose 5-phosphate	229.011	211
369	369	D-ribofuranose 5-phosphate	229.011	211
370	370	D-ribose 5-phosphate	229.011	211
371	371	D-ribulose 5-phosphate	229.011	211
372	372	D-xylulose 5-phosphate	229.011	211
373	373	L(or D)-ribulose 5-phosphate	229.011	211
374	374	α-D-ribose-1-phosphate	229.011	211
375	375	β-L-arabinose 1-phosphate	229.011	211
376	376	(S)-2-amino-6-oxohexanoate	146.081	128.071	C6H11N1O3	114
377	377	6-amino-2-oxohexanoate	146.081	128.071
378	378	(R)-2,3-dihydroxy-3-methylpentanoate	148.073	130.062	C6H11O4	115
379	379	(R)-mevalonate	148.073	130.062
380	380	(R)-pantoate	148.073	130.062
381	381	cis-dienelactone	140.01	122	C6H3O4	116
382	382	trans-dienelactone	140.01	122
383	383	(2Z,4E)-2-hydroxy-6-oxohexa-2,4-dienoate	142.026	124.015	C6H5O4	117
384	384	muconolactone	142.026	124.015
385	385	4-hydroxy-5-methyl-2-methylene-3(2H)-furanone	127.039	109.028	C6H6O3	118
386	386	phloroglucinol	127.039	109.028
387	387	furaneol	129.055	111.044	C6H8O3	119
388	388	furaneol (enol form)	129.055	111.044
389	389	2-carboxy-L-threo-pentonate	209.029	191.019	C6H8O8	120
390	390	a hexaric acid	209.029	191.019
391	391	D-glucarate	209.029	191.019
392	392	(S)-3-methyl-2-oxopentanoate	130.062	112.052	C6H9O3	121
393	393	3-methyl-2-oxopentanoate	130.062	112.052
394	394	4-methyl-2-oxopentanoate	130.062	112.052
395	395	3-dehydro-D-glucose 6-phosphate	257.006	238.995	C6H9O9P1	122
396	396	6-phospho D-glucono-1,5-lactone	257.006	238.093
397	397	D-glycero-D-manno-heptose 7-phosphate	289.032	271.021	C7H13O10P1	123
398	398	D-sedoheptulose 7-phosphate	289.032	271.021
399	399	N5-acetyl-L-ornithine	175.108	157.097	C7H14N2O3	124
400	400	N-acetyl-L-ornithine	175.108	157.097
401	401	2,6-diaminopimelate	191.103	173.092	C7H14N2O4	125
402	402	L,L-diaminopimelate	191.103	173.092
403	403	meso-diaminopimelate	191.103	173.092
404	404	D-ononitol	195.086	177.076	C7H14O6	126
405	405	methyl-D-glucoside	195.086	177.076
406	406	(1R,6S)-6-amino-5-oxocyclohex-2-ene-1-carboxylate	156.066	138.055	C7H9N1O3	127
407	407	(5S,6S)-6-amino-5-hydroxycyclohexa-1,3-diene-1-carboxylate	156.066	138.055
408	408	trans-2,3-dihydro-3-hydroxyanthranilate	156.066	138.055
409	409	an N-acetyl-α-D-hexosamine	222.097	204.087	C8H15N1O6	128
410	410	an N-acetyl-D-hexosamine	222.097	204.087
411	411	an N-acetyl-β-D-hexosamine	222.097	204.087
412	412	N-acetyl-D-galactosamine	222.097	204.087
413	413	N-acetyl-D-glucosamine	222.097	204.087
414	414	N-acetyl-D-mannosamine	222.097	204.087
415	415	N-acetyl-α-D-glucosamine	222.097	204.087
416	416	indole	118.065	100.055	C8H7N1	129
417	417	phenylacetonitrile	118.065	100.055
418	418	(R)-mandelonitrile	134.06	116.049	C8H7N1O1	130
419	419	indolin-2-one	134.06	116.049
420	420	mandelonitrile	134.06	116.049
421	421	(S)-4-hydroxymandelonitrile	150.055	132.044	C8H7N1O2	131
422	422	3-hydroxyindolin-2-one	150.055	132.044
423	423	5,6-dihydroxyindole	150.055	132.044
424	424	(6R)-6-pyruvoyl-5,6,7,8-tetrahydropterin	238.093	220.083	C9H11N5O3	132
425	425	a biopterin	238.093	220.083
426	426	7,8-dihydrobiopterin	240.109	222.099	C9H13N5O3	133
427	427	L-erythro-7,8-dihydrobiopterin	240.109	222.099
428	428	(6R)-L-erythro-5,6,7,8-tetrahydrobiopterin	242.125	224.114	C9H15N5O3	134
429	429	(6R)-tetrahydrobiopterin	242.125	224.114
430	430	daphnetin	179.034	161.023	C9H6O4	135
431	431	esculetin	179.034	161.023
432	432	(indol-3-yl)acetamide	175.087	157.076	C10H10N2O1	136
433	433	IMP	347.039	329.028	C10H11N4O8P1	137
434	434	XMP	363.034	345.023	C10H11N4O9P1	138
435	435	cyclic-AMP	329.052	311.041	C10H11N5O6P1	139
436	436	molybdopterin	392.996	374.986	C10H11N5O6P1S2	140
437	437	L-arogenate	227.079	209.068	C10H12N1O5	141
438	438	L-kynurenine	209.092	191.082	C10H12N2O3	142
439	439	adenosine 5'-phosphosulfate	426.012	408.001	C10H12N5O10P1S1	143
440	440	dAMP	330.06	312.049	C10H12N5O6P1	144
441	441	dTMP	321.048	303.038	C10H13N2O8P1	145
442	442	a 6-hydroxypurine nucleotide	349.054	331.044	C10H13N4O8P1	146
443	443	5-formamido-1-(5-phospho-D-ribosyl)-imidazole-4-carboxamide	365.049	347.039	C10H13N4O9P1	147
444	444	guanosine	284.099	266.088	C10H13N5O5	148
445	445	thymidine	243.098	225.087	C10H14N2O5	149
446	446	EDTA	291.082	273.072	C10H14N2O8	150
447	447	methyl ecgonone	198.112	180.102	C10H15N1O3	151
448	448	anserine	241.13	223.119	C10H16N4O3	152
449	449	linamarin	248.113	230.102	C10H17N1O6	153
450	450	dethiobiotin	214.131	196.121	C10H17N2O3	154
451	451	L-arginino-succinate	290.122	272.112	C10H17N4O6	155
452	452	ecgonine methyl ester	201.136	183.125	C10H18N1O3	156
453	453	β-L-arabinofuranosyl-(1→2)-β-L-arabinofuranose	283.102	265.092	C10H18O9	157
454	454	(E)-1-(L-cysteinylglycin-S-yl)-N-hydroxy-ω-(methylsulfanyl)butan-1-imine	310.089	292.078	C10H19N3O4S2	158
455	455	decanoate	172.146	154.135	C10H19O2	159
456	456	S-(3-methylbutan-3-yl)-L-cysteinylglycine	265.122	247.111	C10H20N2O4S1	160
457	457	(E)-ω-(methylsulfanyl)nonyl-thiohydroximate	236.114	218.103	C10H21N1O1S2	161
458	458	kinetin	216.088	198.077	C10H9N5O1	162
459	459	(1R,6R)-6-hydroxy-2-succinylcyclohexa-2,4-diene-1-carboxylate	239.055	221.044	C11H10O6	163
460	460	methyl (indol-3-yl)acetate	190.086	172.076	C11H11N1O2	164
461	461	5-hydroxy-L-tryptophan	221.092	203.082	C11H12N2O3	165
462	462	N-Formyl-L-kynurenine	237.087	219.076	C11H12N2O4	166
463	463	sinapaldehyde	209.081	191.07	C11H12O4	167
464	464	β-nicotinamide D-ribonucleotide	334.056	316.045	C11H14N2O8P1	168
465	465	S-methyl-5'-thioinosine	299.081	281.07	C11H14N4O4S1	169
466	466	sinapyl alcohol	211.096	193.086	C11H14O4	170
467	467	reduced β-nicotinamide D-ribonucleotide	335.064	317.053	C11H15N2O8P1	171
468	468	S-methyl-5'-thioadenosine	298.097	280.086	C11H15N5O3S1	172
469	469	S-formylglutathione	335.078	317.068	C11H16N3O7S1	173
470	470	N-acetylneuraminate	309.105	291.095	C11H18N1O9	174
471	471	gluconapin	373.05	355.039	C11H18N1O9S2	175
472	472	ε-(γ-L-glutamyl)-L-lysine	276.155	258.145	C11H21N3O5	176
473	473	1,4-dihydroxy-2-naphthoate	204.042	186.031	C11H7O4	177
474	474	(indol-3-yl)acetyl-glycine	232.084	214.074	C12H11N2O3	178
475	475	benzyladenine	226.109	208.098	C12H11N5	179
476	476	gentisate 5-O-β-D-xylopyranoside	286.068	268.058	C12H13O8	180
477	477	N-acetyl-serotonin	219.113	201.102	C12H14N2O2	181
478	478	tetraketide pyrone	224.104	206.094	C12H15O4	182
479	479	queuine	279.133	261.122	C12H16N5O3	183
480	480	arbutin	273.097	255.086	C12H16O7	184
481	481	thiamine	266.12	248.109	C12H17N4O1S1	185
482	482	furaneol glucopyranoside	291.107	273.097	C12H18O8	186
483	483	(R)-4'-phosphopantothenoyl-L-cysteine	400.07	382.059	C12H20N2O9P1S1	187
484	484	3'-ketomaltose	341.108	323.097	C12H20O11	188
485	485	L-nicotianamine	304.15	286.14	C12H21N3O6	189
486	486	N4-(β-N-acetyl-D-glucosaminyl)-L-asparagine	336.14	318.13	C12H21N3O8	190
487	487	3-oxo-dodecanoate	214.156	196.146	C12H21O3	191
488	488	glucoraphanin	437.048	419.037	C12H22N1O10S3	192
489	489	4-(methylsulfanyl)butyl-glucosinolate	421.053	403.042	C12H22N1O9S3	193
490	490	4-(methylsulfanyl)butyl-desulfoglucosinolate	342.104	324.093	C12H23N1O6S2	194
491	491	chitobiose 6'-phosphate	421.122	403.111	C12H25N2O12P1	195
492	492	chitobiose	343.171	325.161	C12H26N2O9	196
493	493	noraucuparin	217.086	199.075	C13H12O3	197
494	494	melatonin	233.128	215.118	C13H16N2O2	198
495	495	benzoyl-β-D-glucopyranose	285.097	267.086	C13H16O7	199
496	496	6,7-dimethyl-8-(1-D-ribityl)lumazine	326.122	308.112	C13H17N4O6	200
497	497	3-[(3aS,4S,7aS)-7a-methyl-1,5-dioxo-octahydro-1H-inden-4-yl]propanoate	238.12	220.109	C13H17O4	201
498	498	CDP-N-dimethylethanolamine	474.091	456.081	C13H23N4O11P2	202
499	499	5-(methylsulfanyl)pentyl-glucosinolate	435.069	417.058	C13H24N1O9S3	203
500	500	5-(methylsulfanyl)pentyl-desulfoglucosinolate	356.12	338.109	C13H25N1O6S2	204
501	501	petivericin	263.056	245.045	C14H14O1S2	205
502	502	pyochelin	324.06	306.049	C14H15N2O3S2	206
503	503	(R)-prunasin	296.113	278.102	C14H17N1O6	207
504	504	methylsalicylate-2-O-β-D-glucoside	315.107	297.097	C14H18O8	208
505	505	1-O-vanilloyl-β-D-glucose	331.102	313.092	C14H18O9	209
506	506	EGTA	377.119	359.109	C14H20N2O10	210
507	507	S-adenosyl-L-homocysteine	385.129	367.118	C14H20N6O5S1	211
508	508	CDTA	347.145	329.134	C14H22N2O8	212
509	509	a tetradecenoate(n-C14:1)	226.193	208.182	C14H25O2	213
510	510	3-oxo-myristate	242.188	224.177	C14H25O3	214
511	511	6-(methylsulfanyl)hexyl-desulfoglucosinolate	370.135	352.125	C14H27N1O6S2	215
512	512	p-coumaroyltriacetate	290.078	272.068	C15H13O6	216
513	513	(indol-3-yl)acetyl-L-glutamate	303.098	285.087	C15H14N2O5	217
514	514	(2S)-flavan-4-ol	227.107	209.096	C15H14O2	218
515	515	3-methoxy-4',5-dihydroxy-trans-stilbene	243.102	225.091	C15H14O3	219
516	516	(2R,3S,4S)-leucocyanidin	307.081	289.071	C15H14O7	220
517	517	sinapoyl-(S)-malate	339.071	321.06	C15H14O9	221
518	518	cinnamoyl-β-D-glucoside	311.113	293.102	C15H18O7	222
519	519	(L-threonylcarbamoyl)adenylate	491.092	473.082	C15H19N6O11P1	223
520	520	isopentenyl adenosine	336.167	318.156	C15H21N5O4	224
521	521	(2E,6E)-farnesyl phosphate	301.156	283.146	C15H25O4P1	225
522	522	3-(glutathion-S-yl)-(3-methyl)butanol	393.156	375.146	C15H26N3O7S1	226
523	523	7-(methylsulfanyl)heptyl-glucosinolate	463.1	445.089	C15H28N1O9S3	227
524	524	7-(methylsulfanyl)heptyl-desulfoglucosinolate	384.151	366.14	C15H29N1O6S2	228
525	525	6,7-dehydrobaicalein	269.044	251.034	C15H8O5	229
526	526	kaempferide	300.063	282.052	C16H11O6	230
527	527	rhamnetin	317.066	299.055	C16H12O7	231
528	528	7-O-methylmyricetin	333.06	315.05	C16H12O8	232
529	529	(3R,4R)-7,2'-dihydroxy-4'-methoxyisoflavanol	289.107	271.096	C16H16O5	233
530	530	coniferin	343.139	325.128	C16H22O8	234
531	531	loganate	376.136	358.126	C16H23O10	235
532	532	7-deoxyloganate	360.141	342.131	C16H23O9	236
533	533	O-sinapoylcholine	311.173	293.162	C16H24N1O5	237
534	534	N,N'-diacetylchitobiose	425.177	407.166	C16H28N2O11	238
535	535	8-(methylsulfanyl)octyl-desulfoglucosinolate	398.167	380.156	C16H31N1O6S2	239
536	536	apigenin-7,4'-dimethyl ether	299.091	281.081	C17H14O5	240
537	537	7,4'-dimethylmyricetin	347.076	329.066	C17H14O8	241
538	538	cinnamoyltyramine	268.133	250.123	C17H17N1O2	242
539	539	p-coumaroyltyramine	284.128	266.118	C17H17N1O3	243
540	540	α-(2-methoxyphenoxy)-β-hydroxypropiovanillone	319.118	301.107	C17H18O6	244
541	541	riboflavin	376.138	358.127	C17H19N4O6	245
542	542	scopolamine	304.154	286.144	C17H21N1O4	246
543	543	reduced riboflavin	379.161	361.151	C17H22N4O6	247
544	544	(6S)-hydroxyhyoscyamine	307.178	289.167	C17H24N1O4	248
545	545	a jasmonoyl-glutamine	338.184	320.173	C17H25N2O5	249
546	546	a jasmonoyl-L-valine	309.193	291.183	C17H26N1O4	250
547	547	sterone-ring	233.226	215.216	C17H28	251
548	548	(E)-1-(glutathion-S-yl)-N-hydroxy-ω-(methylsulfanyl)hexan-1-imine	466.155	448.144	C17H29N4O7S2	252
549	549	a methylhexadecanoic acid	271.263	253.253	C17H34O2	253
550	550	betanidin	387.082	369.072	C18H14N2O8	254
551	551	(S)-usnate	343.081	325.071	C18H14O7	255
552	552	N-feruloyltyramine	314.139	296.128	C18H19N1O4	256
553	553	(Z)-1-(glutathion-S-yl)-N-hydroxy-2-phenylethan-1-imine	440.136	422.125	C18H23N4O7S1	257
554	554	a steroid sulfate	336.139	318.128	C18H23O4S1	258
555	555	(+)-7-epi-12-oxojasmonoyl-L-isoleucine	337.188	319.178	C18H26N1O5	259
556	556	13-apo-β-carotenone	259.206	241.195	C18H26O1	260
557	557	2-(8-hydroxy-2-oxotridecyl)-6-oxopyran-4-olate	324.193	306.183	C18H27O5	261
558	558	(+)-7-epi-12-hydroxyjasmonoyl-L-isoleucine	339.204	321.193	C18H28N1O5	262
559	559	2-(2,8-dihydroxytridecyl)-6-oxopyran-4-olate	326.209	308.198	C18H29O5	263
560	560	a linoleate group	265.253	247.242	C18H32O1	264
561	561	oleamide	282.279	264.269	C18H35N1O1	265
562	562	1,18-octadecane-diol	287.294	269.284	C18H38O2	266
563	563	kanamycin B	489.3	471.29	C18H42N5O10	267
564	564	(indol-3-yl)acetyl-L-phenylalanine	322.131	304.121	C19H17N2O3	268
565	565	7,3',4',5'-tetramethylmyricetin	375.107	357.097	C19H18O8	269
566	566	gibberellin A34-catabolite	345.133	327.123	C19H20O6	270
567	567	(S)-scoulerine	328.154	310.144	C19H21N1O4	271
568	568	sinapoyltyramine	344.149	326.139	C19H21N1O5	272
569	569	gibberellin A9	316.167	298.156	C19H23O4	273
570	570	methylsalicylate O-β-D-xylopyranosyl-(1->6)-O-β-D-glucopyranoside	447.15	429.139	C19H26O12	274
571	571	(E)-1-(glutathion-S-yl)-N-hydroxy-ω-(methylsulfanyl)octan-1-imine	494.186	476.176	C19H33N4O7S2	275
572	572	1-palmitoylglycerone 3-phosphate	407.219	389.209	C19H35O7P1	276
573	573	1-palmitoyl-sn-glycerol 3-phosphate	409.235	391.224	C19H37O7P1	277
574	574	a porphyrin	311.129	293.119	C20H14N4	278
575	575	a glucosyloxyanthraquinone	387.107	369.097	C20H18O8	279
576	576	dehydrodiconiferyl acid	372.12	354.11	C20H19O7	280
577	577	dehydrodiconiferyl aldehyde	357.133	339.123	C20H20O6	281
578	578	(glutathion-S-yl)(1H-indol-3-yl)acetonitrile	461.136	443.126	C20H22N5O6S1	282
579	579	gibberellin A38	362.172	344.162	C20H25O6	283
580	580	ajmaline	327.207	309.196	C20H26N2O2	284
581	581	(R)-amygdalin	458.166	440.155	C20H27N1O11	285
582	582	all-trans-geranyl-geranyl monophosphate	369.219	351.208	C20H33O4P1	286
583	583	(E)-1-(glutathion-S-yl)-N-hydroxy-ω-(methylsulfanyl)nonan-1-imine	508.202	490.191	C20H35N4O7S2	287
584	584	dihydrogeranylgeranyl diphosphate	450.193	432.183	C20H35O7P2	288
585	585	tetrahydrogeranylgeranyl diphosphate	452.209	434.198	C20H37O7P2	289
586	586	3-dehydrosphinganine (C20)	329.329	311.318	C20H42N1O2	290
587	587	N6'-acetylkanamycin-B	530.303	512.293	C20H43N5O11	291
588	588	1-(3,4-dihydroxyphenyl)-3-(3-C-glucosyl-2,4,6-trihydroxyphenyl)propane-1,3-dione	466.111	448.1	C21H21O12	292
589	589	(-)-bursehernin	371.149	353.138	C21H22O6	293
590	590	(-)-5'-demethylyatein	387.144	369.133	C21H22O7	294
591	591	a flavanone-7-O-β-D-glucoside	403.139	385.128	C21H22O8	295
592	592	nothofagin	437.144	419.134	C21H24O10	296
593	593	17-O-acetylnorajmaline	355.202	337.191	C21H26N2O3	297
594	594	(S)-laudanosine	359.209	341.199	C21H28N1O4	298
595	595	cortisone	361.201	343.19	C21H28O5	299
596	596	eugenol O-β-D-xylopyranosyl-(1->6)-O-β-D-glucopyranoside	459.186	441.176	C21H30O11	300
597	597	β-D-glucopyranosyl abscisate	427.196	409.186	C21H30O9	301
598	598	5-β-pregnan-3,20 dione	317.248	299.237	C21H32O2	302
599	599	1-oleoyl-2-lyso-glycerone phosphate	433.235	415.224	C21H37O7P1	303
600	600	1-oleoyl-sn-glycerol 3-phosphate	435.251	417.24	C21H39O7P1	304
601	601	(-)-deoxypodophyllotoxin	399.144	381.133	C22H22O7	305
602	602	17-O-acetylajmaline	369.217	351.207	C22H28N2O3	306
603	603	5,5'-dimethoxylariciresinol	421.186	403.175	C22H28O8	307
604	604	taxa-4(20),11-dien-5-α-yl acetate	331.263	313.253	C22H34O2	308
605	605	deacetoxyvindoline	400.236	382.225	C23H31N2O4	309
606	606	delphinidin 3-O-(6''-O-malonyl)-β-glucoside	549.088	531.077	C24H20O15	310
607	607	vindoline	458.241	440.231	C25H33N2O6	311
608	608	(+)-sesaminol 2-O-β-D-glucoside	533.165	515.155	C26H28O12	312
609	609	19-O-β-glucopyranosyl-steviol	481.28	463.269	C26H40O8	313
610	610	3'-O-demethyl-staurosporine	454.2	436.189	C27H25N4O3	314
611	611	3,5-di-C-glucosyl-2,4,4',6-tetrahydroxydibenzoylmethane	612.168	594.158	C27H31O16	315
612	612	a flavanone 7-O-[α-L-rhamnosyl-(1→2)-β-D-glucoside]	549.197	531.186	C27H32O12	316
613	613	3',5'-di-C-glucosylphloretin	599.197	581.186	C27H34O15	317
614	614	eugenol 2-O-β-D-glucopyranosyl-(1 -> 2)-[O-β-D-xylopyranosyl-(1 -> 6)]-O-β-D-glucopyranoside	621.239	603.228	C27H40O16	318
615	615	16-sinapoyloxypalmitate	478.293	460.282	C27H41O7	319
616	616	furostanol-26-aldehyde	431.316	413.305	C27H42O4	320
617	617	furostanol-26-alcohol	433.331	415.321	C27H44O4	321
618	618	26-amino-furostanol	432.347	414.337	C27H45N1O3	322
619	619	22,26-dihydroxycholesterol	419.352	401.341	C27H46O3	323
620	620	epi-cholestanol	389.378	371.367	C27H48O1	324
621	621	(22α)-hydroxy-cholestanol	405.373	387.362	C27H48O2	325
622	622	staurosporine	468.216	450.205	C28H27N4O3	326
623	623	ergosta-5,7,22,24(28)-tetraen-3β-ol	395.331	377.32	C28H42O1	327
624	624	4α-formyl-5α-cholesta-7,24-dien-3β-ol	413.341	395.331	C28H44O2	328
625	625	(22R,23R)-22,23-dihydroxy-campest-4-en-3-one	431.352	413.341	C28H46O3	329
626	626	castasterone 22-O-sulfate	544.306	526.296	C28H47O8S1	330
627	627	brassinolide 22-O-sulfate	560.301	542.291	C28H47O9S1	331
628	628	26-hydroxybrassinolide	497.347	479.337	C28H48O7	332
629	629	6α-hydroxy-castasterone	467.373	449.363	C28H50O5	333
630	630	O-methyl-4-O-[2,4-di-O-methyl-α-L-fucopyranosyl-(1→3)-α-L-rhamnopyranosyl-(1→3)-2-O-methyl-α-L-rhamnopyranosyl]-hydroxybenzoate	633.275	615.265	C29H44O15	334
631	631	4α-formyl-ergosta-7,24(241)-dien-3β-ol	427.357	409.346	C29H46O2	335
632	632	(22R,23R)-28-homocastasterone	479.373	461.363	C29H50O5	336
633	633	O-phosphoethanolamine	141.019	123.008	C2H7N1O4P1	337
634	634	all-trans-4,4'-diapo-ζ-carotene	405.352	387.341	C30H44	338
635	635	glycyrrhetaldehyde	455.352	437.341	C30H46O3	339
636	636	cycloeucalenone	425.378	407.367	C30H48O1	340
637	637	presqualene diphosphate	584.303	566.292	C30H49O7P2	341
638	638	11α,30-dihydroxy-β-amyrin	459.383	441.373	C30H50O3	342
639	639	cycloartanol	429.409	411.399	C30H52O1	343
640	640	dammarenediol II	445.404	427.393	C30H52O2	344
641	641	24-methylenecycloartanol	441.409	423.399	C31H52O1	345
642	642	3'-acetyl-3-dodecanoyl-4-(3-methylbutanoyl)sucrose	651.359	633.348	C31H54O14	346
643	643	C31-phthiodiolone A	483.477	465.467	C31H62O3	347
644	644	C31-phthiotriol	485.493	467.482	C31H64O3	348
645	645	steviolbioside	642.325	624.314	C32H49O13	349
646	646	C32-phthiocerol A	499.508	481.498	C32H66O3	350
647	647	(Z,Z)-biliverdin-IX α	581.239	563.229	C33H32N4O6	351
648	648	pyropheophorbide a	534.263	516.252	C33H33N4O3	352
649	649	C33-phthiodiolone A	511.508	493.498	C33H66O3	353
650	650	C33-phthiotriol A	513.524	495.514	C33H68O3	354
651	651	Mg-protoporphyrin	583.219	565.208	C34H30N4O4Mg1	355
652	652	C-132-carboxypyropheophorbide a	578.252	560.242	C34H33N4O5	356
653	653	tricoumaroyl spermidine	584.276	566.265	C34H37N3O6	357
654	654	castasterone-23-O-glucoside	627.41	609.4	C34H58O10	358
655	655	C34-phenolphthiodiolenone A	531.441	513.43	C34H58O4	359
656	656	lipid X	710.424	692.413	C34H64N1O12P1	360
657	657	C34-phthiocerol A	527.54	509.529	C34H70O3	361
658	658	3,8-divinyl protochlorophyllide a	609.198	591.188	C35H28N4O5Mg1	362
659	659	chlorophyllide b	627.209	609.198	C35H30N4O6Mg1	363
660	660	chlorophyllide a	613.23	595.219	C35H32N4O5Mg1	364
661	661	magnesium-protoporphyrin IX 13-monomethyl ester	598.243	580.232	C35H33N4O4Mg1	365
662	662	pheophorbide a	591.26	573.25	C35H34N4O5	366
663	663	red chlorophyll catabolite	625.266	607.255	C35H36N4O7	367
664	664	C35-phenolphthiocerol A	549.488	531.477	C35H64O4	368
665	665	dipalmitoyl phosphatidate	647.465	629.454	C35H67O8P1	369
666	666	coproporphyrinogen III	657.292	639.281	C36H40N4O8	370
667	667	C36-phenolphthiodiolenone A	559.472	541.462	C36H62O4	371
668	668	C36-phenolphthiodiolone A	561.488	543.477	C36H64O4	372
669	669	triferuloyl spermidine	674.307	656.297	C37H43N3O9	373
670	670	C37-phenolphthiocerol A	577.519	559.508	C37H68O4	374
671	671	dihydroxyferuloyl-sinapoyl spermidine	736.308	718.297	C38H45N3O12	375
672	672	rebaudioside B	804.377	786.367	C38H59O18	376
673	673	ubiquinone-6	591.441	573.43	C39H58O4	377
674	674	ubiquinol-6	593.456	575.446	C39H60O4	378
675	675	1-[18-hydroxyoeoyl]-2-[18-hydroxy-lioleoyl]-sn-glycerol 3-phosphate	729.47	711.46	C39H69O10P1	379
676	676	dioleoyl phosphatidate	699.496	681.485	C39H71O8P1	380
677	677	2,3-diphospho-D-glycerate	261.927	243.917	C3H3O10P2	381
678	678	(S)-ureidoglycine	134.056	116.045	C3H7N3O3	382
679	679	N-methylethanolamine phosphate	155.034	137.024	C3H9N1O4P1	383
680	680	astaxanthin	597.394	579.383	C40H52O4	384
681	681	antheraxanthin	585.43	567.42	C40H56O3	385
682	682	15,9'-di-cis-phytofluene	543.492	525.482	C40H62	386
683	683	15-cis-phytoene	545.508	527.498	C40H64	387
684	684	1-α-linolenoyl-2-(3E)-hexadecenoyl-phosphatidylglycerol	742.478	724.467	C40H70O10P1	388
685	685	a 4-hydroxysphing-8-enine-22:0 ceramide	638.608	620.598	C40H79N1O4	389
686	686	1-palmitoyl-2-linoleoyl-phosphatidylcholine	758.569	740.559	C42H80N1O8P1	390
687	687	1-palmitoyl-2-oleoyl-phosphatidylcholine	760.585	742.575	C42H82N1O8P1	391
688	688	1-oleoyl-2-oleoyl-phosphatidylcholine	786.601	768.59	C44H84N1O8P1	392
689	689	a 4-hydroxysphing-8-enine-26:0 ceramide	694.671	676.66	C44H87N1O4	393
690	690	1-18:2-2-18:2-monogalactosyldiacylglycerol	779.567	761.556	C45H78O10	394
691	691	3-(all-trans-octaprenyl)benzene-1,2-diol	655.545	637.534	C46H70O2	395
692	692	N-dimethylethanolamine phosphate	169.05	151.039	C4H11N1O4P1	396
693	693	cytosine	112.051	94.04	C4H5N3O1	397
694	694	L-aspartate 4-semialdehyde	118.05	100.039	C4H7N1O3	398
695	695	1-deoxy-L-glycero-tetrulose 4-phosphate	183.005	164.995	C4H7O6P1	399
696	696	demethylmenaquinol-8	705.561	687.55	C50H72O2	400
697	697	menaquinol-8	719.576	701.566	C51H74O2	401
698	698	pheophytin b	885.552	867.542	C55H72N4O6	402
699	699	demethylmenaquinol-9	773.623	755.613	C55H80O2	403
700	700	2-C-methyl-D-erythritol-2,4-cyclodiphosphate	276.987	258.977	C5H10O9P2	404
701	701	(R,S)-piperazine-2-carboxamide	130.097	112.087	C5H11N3O1	405
702	702	2-C-methyl-D-erythritol 4-phosphate	215.032	197.021	C5H11O7P1	406
703	703	phosphocholine	183.065	165.055	C5H13N1O4P1	407
704	704	a serine phosphoethanolamine	229.058	211.048	C5H13N2O6P1	408
705	705	L-canavanine	178.106	160.095	C5H13N4O3	409
706	706	hypoxanthine	137.046	119.035	C5H4N4O1	410
707	707	(S)-5-hydroxyisourate	185.031	167.02	C5H4N4O4	411
708	708	(E)-glutaconate	129.018	111.008	C5H4O4	412
709	709	N-methyl-DL-aspartate	146.045	128.034	C5H7N1O4	413
710	710	γ-L-glutamyl 5-phosphate	226.011	208.001	C5H8N1O7P1	414
711	711	isopentenyl phosphate	165.031	147.021	C5H9O4P1	415
712	712	(R)-5-phosphomevalonate	226.024	208.013	C6H10O7P1	416
713	713	L-pipecolate	130.086	112.076	C6H11N1O2	417
714	714	aminomethylpyrimidine	140.106	122.095	C6H11N4	418
715	715	β-L-fucose 1-phosphate	243.026	225.016	C6H11O8P1	419
716	716	D-alanyl-D-alanine	161.092	143.082	C6H12N2O3	420
717	717	D-alanyl-D-serine	177.087	159.076	C6H12N2O4	421
718	718	a hexosamine	180.087	162.076	C6H13N1O5	422
719	719	L-citrulline	176.103	158.092	C6H13N3O3	423
720	720	mycosamine	165.1	147.089	C6H14N1O4	424
721	721	Nω-hydroxy-L-arginine	192.122	174.111	C6H15N4O3	425
722	722	pteridine-ring	133.051	115.04	C6H4N4	426
723	723	nitrobenzene	124.039	106.029	C6H5N1O2	427
724	724	nicotinamide	123.055	105.045	C6H6N2O1	428
725	725	a 6,7-dihydropteridine	135.067	117.056	C6H6N4	429
726	726	a thiopurine S-methylether	167.039	149.028	C6H6N4S1	430
727	727	2-oxoadipate	159.029	141.018	C6H6O5	431
728	728	N-ethylmaleimide	126.055	108.044	C6H7N1O2	432
729	729	(2R,3S)-2,3-dimethylmalate	161.044	143.034	C6H8O5	433
730	730	5-(2-hydroxyethyl)-4-methylthiazole	144.048	126.037	C6H9N1O1S1	434
731	731	4-amino-2-methyl-5-pyrimidinemethanol	140.082	122.071	C6H9N3O1	435
732	732	L-histidine	156.077	138.066	C6H9N3O2	436
733	733	D-sedoheptulose 1,7-bisphosphate	366.983	348.972	C7H12O13P2	437
734	734	2-amino-3,7-dideoxy-D-threo-hept-6-ulosonate	192.087	174.076	C7H13N1O5	438
735	735	L-djenkolate	255.047	237.036	C7H14N2O4S2	439
736	736	N1-(5-phospho-β-D-ribosyl)glycinamide	286.056	268.045	C7H14N2O8P1	440
737	737	α -ethynylagmatine	155.129	137.119	C7H14N4	441
738	738	(E)-α-monofluoromethyldehydroarginine	206.117	188.107	C7H14N4O2F1	442
739	739	α-difluoromethylarginine	225.116	207.105	C7H14N4O2F2	443
740	740	(E)-ω-(methylsulfanyl)hexyl-thiohydroximate	194.067	176.056	C7H15N1O1S2	444
741	741	a D,L-carnitine	162.112	144.102	C7H15N1O3	445
742	742	α-monofluoromethylarginine	207.125	189.115	C7H15N4O2F1	446
743	743	(S)-2,3,4,5-tetrahydrodipicolinate	170.045	152.034	C7H7N1O4	447
744	744	(1R,2S)-homoisocitrate	204.026	186.016	C7H7O7	448
745	745	3,5-dihydroxyanisole	141.055	123.044	C7H8O3	449
746	746	N-acetyl-L-glutamate	188.055	170.045	C7H9N1O5	450
747	747	N-acetylglutamyl-phosphate	267.014	249.003	C7H9N1O8P1	451
748	748	caffeine	195.088	177.077	C8H10N4O2	452
749	749	1,3,7-trimethylurate	211.083	193.072	C8H10N4O3	453
750	750	N,N-dimethylaniline	122.096	104.086	C8H11N1	454
751	751	N,N-dimethylaniline-N-oxide	138.091	120.081	C8H11N1O1	455
752	752	pyridoxine	170.081	152.071	C8H11N1O3	456
753	753	3,6,8-trimethyl-2-oxo-4-hydroxy-4-carboxy-5-ureidoimidazoline	244.08	226.07	C8H11N4O5	457
754	754	D-perosaminopyranose	206.102	188.092	C8H15N1O5	458
755	755	N-acetyl-β-glucosaminylamine	221.113	203.103	C8H16N2O5	459
756	756	(E)-ω-(methylsulfanyl)heptyl-thiohydroximate	208.082	190.072	C8H17N1O1S2	460
757	757	felinine	208.1	190.09	C8H17N1O3S1	461
758	758	mycaminose	193.131	175.12	C8H18N1O4	462
759	759	sn-glycero-3-phosphocholine	258.11	240.1	C8H20N1O6P1	463
760	760	DIBOA	181.037	163.026	C8H6N1O4	464
761	761	acibenzolar-S-methyl	210.999	192.989	C8H6N2O1S2	465
762	762	HBOA	166.05	148.039	C8H7N1O3	466
763	763	2-benzyl-thiohydroximate-O-sulfate	245.989	227.978	C8H7N1O4S2	467
764	764	phenylacetaldehyde	121.065	103.054	C8H8O1	468
765	765	pyridoxal	168.066	150.055	C8H9N1O3	469
766	766	4,5-seco-dopa	229.058	211.048	C9H10N1O6	470
767	767	tranylcypromine	134.096	116.086	C9H11N1	471
768	768	L-dopa	198.076	180.066	C9H11N1O4	472
769	769	dUTP	464.95	446.939	C9H11N2O14P3	473
770	770	dUMP	307.033	289.022	C9H11N2O8P1	474
771	771	2-amino-6-acetyl-3,7,8,9-tetrahydro-3H-pyrimido[4,5-b][1,4]diazepin-4-one	222.099	204.088	C9H11N5O2	475
772	772	2'-deoxyuridine	229.082	211.071	C9H12N2O5	476
773	773	dCTP	463.966	445.955	C9H12N3O13P3	477
774	774	CDP group	402.01	383.999	C9H13N3O11P2	478
775	775	2'-deoxycytidine	228.098	210.087	C9H13N3O4	479
776	776	cytidine	244.093	226.082	C9H13N3O5	480
777	777	CMP group	323.051	305.041	C9H13N3O8P1	481
778	778	5-amino-6-(5-phospho-D-ribosylamino)uracil	353.049	335.039	C9H13N4O9P1	482
779	779	carnosine	227.114	209.103	C9H14N4O3	483
780	780	(R)-4'-phosphopantothenate	297.061	279.05	C9H15N1O8P1	484
781	781	8-amino-7-oxononanoate	188.128	170.118	C9H17N1O3	485
782	782	S-ribosyl-L-homocysteine	268.085	250.074	C9H17N1O6S1	486
783	783	D-octopine	247.14	229.13	C9H18N4O4	487
784	784	3-β-D-galactosyl-sn-glycerol	255.107	237.097	C9H18O8	488
785	785	(E)-ω-(methylsulfanyl)octyl-thiohydroximate	222.098	204.088	C9H19N1O1S2	489
786	786	3-(3,4-dihydroxyphenyl)pyruvate	196.037	178.026	C9H7O5	490
787	787	cinnamaldehyde	133.065	115.054	C9H8O1	491
788	788	3-phenyllactate	166.062	148.052	C9H9O3	492
789	1	D-cellobiose	343.123	325.113	C12H22O11	1
790	2	galactinol	343.123	325.113
791	3	gentiobiose	343.123	325.113
792	4	isomaltose	343.123	325.113
793	5	kojibiose	343.123	325.113
794	6	lactose	343.123	325.113
795	7	maltose	343.123	325.113
796	8	palatinose	343.123	325.113
797	9	sucrose	343.123	325.113
798	10	trehalose	343.123	325.113
799	11	α,α-trehalose	343.123	325.113
800	12	α1,6-D mannobiose	343.123	325.113
801	13	β-1,2-D-mannobiose	343.123	325.113
802	14	β-1,4-D-mannobiose	343.123	325.113
803	15	β-maltose	343.123	325.113
804	16	1-O-4-hydroxybenzoyl-β-D-glucose	301.092	283.081	C13H16O8	2
805	17	salicylate β-D-glucose ester	301.092	283.081
806	18	(-)-glycinol	273.076	255.065	C15H12O5	3
807	19	(2S)-naringenin	273.076	255.065
808	20	(3R)-2'-hydroxydihydrodaidzein	273.076	255.065
809	21	1-phenyl-3-(2,4,6-trihydroxyphenyl)propane-1,3-dione	273.076	255.065
810	22	2,4',7-trihydroxyisoflavanone	273.076	255.065
811	23	naringenin	273.076	255.065
812	24	naringenin chalcone	273.076	255.065
813	25	(4S)-2,3-dehydro-leucocyanidin	305.066	287.055	C15H12O7	4
814	26	2-hydroxyeriodictyol	305.066	287.055
815	27	taxifolin	305.066	287.055
816	28	1-kestotriose	505.176	487.166	C18H32O16	5
817	29	maltotriose	505.176	487.166
818	30	neokestose	505.176	487.166
819	31	raffinose	505.176	487.166
820	32	pelargonidin 3-O-sophoroside	595.166	577.155	C27H30O15	6
821	33	pelargonidin-3,5-di-O-β-D-glucoside	595.166	577.155
822	34	cyanidin 3,5-di-O-β-D-glucoside	611.161	593.15	C27H30O16	7
823	35	cyanidin 3,7-di-O-β-D-glucoside	611.161	593.15
824	36	delphinidin 3-O-rutinoside	611.161	593.15
825	37	dehydrotomatidine	414.337	396.326	C27H43N1O2	8
826	38	solasod-3-one	414.337	396.326
827	39	solasodine	414.337	396.326
828	40	tomatid-3-one	414.337	396.326
829	41	soladulcidine	416.352	398.342	C27H45N1O2	9
830	42	tomatidine	416.352	398.342
831	43	24-methylidenelophenol	413.378	395.367	C29H48O1	10
832	44	31-norcycloartanone	413.378	395.367
833	45	4,4-dimethyl-5-α-cholesta-8,14-dien-3-β-ol	413.378	395.367
834	46	4α,14α-dimethyl-5α-cholesta-8,24-dien-3β-ol	413.378	395.367
835	47	4α,14α-dimethyl-9β,19-cyclo-5α-cholest-24-en-3β-ol	413.378	395.367
836	48	4α-methyl-5α-ergosta-8,24-dien-3β-ol	413.378	395.367
837	49	avenasterol	413.378	395.367
838	50	isofucosterol	413.378	395.367
839	51	stigmasterol	413.378	395.367
840	52	Δ24-25-sitosterol	413.378	395.367
841	53	(22α)-hydroxy-sitosterol	431.388	413.378	C29H50O2	11
842	54	4α-hydroxymethyl-4β-methyl-5α-cholest-7-en-3β-ol	431.388	413.378
843	55	α-tocopherol	431.388	413.378
844	56	D-glyceraldehyde 3-phosphate	168.99	150.979	C3H5O6P1	12
845	57	DL-glyceraldehyde 3-phosphate	168.99	150.979
846	58	glycerone phosphate	168.99	150.979
847	59	D-cysteine	122.027	104.016	C3H7N1O2S1	13
848	60	L-cysteine	122.027	104.016
849	61	(S)-3-amino-2-methylpropanoate	104.071	86.06	C4H9N1O2	14
850	62	3-amino-2-methylpropanoate	104.071	86.06
851	63	4-aminobutanoate	104.071	86.06
852	64	N,N-dimethylglycine	104.071	86.06
853	65	N-methyl-β-alanine	104.071	86.06
854	66	2-methylserine	120.066	102.055	C4H9N1O3	15
855	67	DL-allothreonine	120.066	102.055
856	68	L-allo-threonine	120.066	102.055
857	69	L-homoserine	120.066	102.055
858	70	L-threonine	120.066	102.055
859	71	aldehydo-D-ribose	151.06	133.05	C5H10O5	16
860	72	aldehydo-D-xylose	151.06	133.05
861	73	aldehydo-L-arabinose	151.06	133.05
862	74	an arabinofuranose	151.06	133.05
863	75	an arabinopyranose	151.06	133.05
864	76	D-apiose	151.06	133.05
865	77	D-arabinofuranose	151.06	133.05
866	78	D-arabinopyranose	151.06	133.05
867	79	D-arabinose	151.06	133.05
868	80	D-ribofuranose	151.06	133.05
869	81	D-ribopyranose	151.06	133.05
870	82	D-ribose	151.06	133.05
871	83	D-ribulose	151.06	133.05
872	84	D-xylopyranose	151.06	133.05
873	85	D-xylose	151.06	133.05
874	86	D-xylulose	151.06	133.05
875	87	L-arabinofuranose	151.06	133.05
876	88	L-arabinopyranose	151.06	133.05
877	89	L-arabinose	151.06	133.05
878	90	L-lyxopyranose	151.06	133.05
879	91	L-xylopyranose	151.06	133.05
880	92	L-xylose	151.06	133.05
881	93	L-xylulose	151.06	133.05
882	94	pentose-ring	151.06	133.05
883	95	ribulose	151.06	133.05
884	96	xylulose	151.06	133.05
885	97	α-D-arabinofuranose	151.06	133.05
886	98	α-D-ribofuranose	151.06	133.05
887	99	α-D-xylopyranose	151.06	133.05
888	100	α-L-arabinofuranose	151.06	133.05
889	101	α-L-xylopyranose	151.06	133.05
890	102	β-D-ribofuranose	151.06	133.05
891	103	β-D-xylopyranose	151.06	133.05
892	104	β-L-arabinofuranose	151.06	133.05
893	105	β-L-arabinopyranose	151.06	133.05
894	106	L-methionine	150.058	132.048	C5H11N1O2S1	17
895	107	penicillamine	150.058	132.048
896	108	3-acetamidopropanal	116.071	98.06	C5H9N1O2	18
897	109	D-proline	116.071	98.06
898	110	L-proline	116.071	98.06
899	111	(S)-4-amino-5-oxopentanoate	132.066	114.055	C5H9N1O3	19
900	112	2-amino-4-oxo-pentoate	132.066	114.055
901	113	5-aminolevulinate	132.066	114.055
902	114	cis-4-hydroxy-D-proline	132.066	114.055
903	115	L-glutamate-5-semialdehyde	132.066	114.055
904	116	a 2,3-didehydropyranose	179.055	161.044	C6H10O6	20
905	117	a 2-dehydropyranose	179.055	161.044
906	118	a 3-dehydropyranose	179.055	161.044
907	119	a D-aldonolactone	179.055	161.044
908	120	D-glucono-1,5-lactone	179.055	161.044
909	121	L-galactono-1,4-lactone	179.055	161.044
910	122	L-galactono-1,5-lactone	179.055	161.044
911	123	L-gulono-1,4-lactone	179.055	161.044
912	124	scyllo-inosose	179.055	161.044
913	125	(R,S)-piperidine-2-carboxamide	129.102	111.092	C6H12N2O1	21
914	126	(R,S)-piperidine-3-carboxamide	129.102	111.092
915	127	2-deoxy-D-glucose	165.076	147.065	C6H12O5	22
916	128	aldehydo-L-fucose	165.076	147.065
917	129	D-fucofuranose	165.076	147.065
918	130	D-fucopyranose	165.076	147.065
919	131	D-fucose	165.076	147.065
920	132	D-quinovopyranose	165.076	147.065
921	133	D-quinovose	165.076	147.065
922	134	D-rhamnopyranose	165.076	147.065
923	135	L-fucopyranose	165.076	147.065
924	136	L-fucose	165.076	147.065
925	137	L-rhamnofuranose	165.076	147.065
926	138	L-rhamnopyranose	165.076	147.065
927	139	L-rhamnulofuranose	165.076	147.065
928	140	L-rhamnulose	165.076	147.065
929	141	α-D-fucopyranose	165.076	147.065
930	142	α-D-quinovopyranose	165.076	147.065
931	143	α-D-rhamnopyranose	165.076	147.065
932	144	α-L-fucopyranose	165.076	147.065
933	145	α-L-rhamnopyranose	165.076	147.065
934	146	β-L-fucopyranose	165.076	147.065
935	147	β-L-rhamnopyranose	165.076	147.065
936	148	L-isoleucine	132.102	114.091	C6H13N1O2	23
937	149	L-leucine	132.102	114.091
938	150	β-alanine betaine	132.102	114.091
939	151	a hexose 1-phosphate	261.037	243.026	C6H13O9P1	24
940	152	D-mannitol 1-phosphate	261.037	243.026
941	153	D-sorbitol 6-phosphate	261.037	243.026
942	154	a hexitol	183.086	165.076	C6H14O6	25
943	155	D-mannitol	183.086	165.076
944	156	D-sorbitol	183.086	165.076
945	157	galactitol	183.086	165.076
946	158	L-iditol	183.086	165.076
947	159	4-hydroxy-4-methyl-2-oxoglutarate	175.024	157.013	C6H6O6	26
948	160	L-dehydro-ascorbate	175.024	157.013
949	161	(2R,3S)-3-isopropylmalate	175.06	157.05	C7H10O5	27
950	162	(2S)-2-isopropylmalate	175.06	157.05
951	163	D-sedoheptulose	211.081	193.071	C7H14O7	28
952	164	L-glycero-D-manno-heptose	211.081	193.071
953	165	5-hydroxy-coniferaldehyde	195.065	177.055	C10H10O4	29
954	166	scoparone	207.065	189.055	C11H10O4	30
955	167	L-tryptophan	205.097	187.087	C11H12N2O2	31
956	168	1-O-(4-coumaroyl)-β-D-glucose	327.107	309.097	C15H18O8	32
957	169	scopolin	355.102	337.092	C16H18O9	33
958	170	(9Z)-octadec-9-ene-1,18-diol	285.279	267.268	C18H36O2	34
959	171	1-phenyl-3-(3-C-glucosyl-2,4,6-trihydroxyphenyl)propane-1,3-dione	435.129	417.118	C21H22O10	35
960	172	delphinidin 3-O-rutinoside-7-O-glucoside	773.213	755.203	C33H40O21	36
961	173	tomatidine galactoside	578.405	560.395	C33H55N1O7	37
962	174	β1-tomatine	902.511	884.5	C45H75N1O17	38
963	175	uracil	113.035	95.024	C4H4N2O2	39
964	176	succinate	117.018	99.0077	C4H4O4	40
965	177	L-asparagine	133.061	115.05	C4H8N2O3	41
966	178	L-homocysteine	136.043	118.032	C4H9N1O2S1	42
967	179	α-tomatine	1034.55	1016.54	C50H83N1O21	43
968	180	L-glutamine	147.076	129.066	C5H10N2O3	44
969	181	glutarate	131.034	113.023	C5H6O4	45
970	182	O-acetyl-L-serine	148.06	130.05	C5H9N1O4	46
971	183	L-rhamnono-1,4-lactone	163.06	145.05	C6H10O5	47
972	184	L-xylo-hex-3-ulono-1,4-lactone	177.039	159.029	C6H8O6	48
973	185	(2S)-2-isopropyl-3-oxosuccinate	173.044	155.034	C7H8O5	49
974	186	(2R,6Z)-2-hydroxy-6-(hydroxymethylidene)-2,5-dimethylcyclohex-4-ene-1,3-dione	183.065	165.055	C9H10O4	50
975	187	L-phenylalanine	166.086	148.076	C9H11N1O2	51
976	188	L-tyrosine	182.081	164.071	C9H11N1O3	52
977	189	4-coumaraldehyde	149.06	131.049	C9H8O2	53
978	190	4-oxo-4-(pyridin-3-yl)butanal	164.071	146.06	C9H9N1O2	54
979	1	cyclic pyranopterin phosphate	345.047	327.036	C10H11N5O7P1	1
980	2	cyclic-GMP	345.047	327.036
981	3	ADP	425.013	407.003	C10H12N5O10P2	2
982	4	dGDP	425.013	407.003
983	5	2-hydroxy-dATP	503.972	485.961	C10H12N5O13P3	3
984	6	ATP	503.972	485.961
985	7	dGTP	503.972	485.961
986	8	(8S)-3',8-cyclo-7,8-dihydroguanosine 5'-triphosphate	519.967	501.956	C10H12N5O14P3	4
987	9	8-oxo-dGTP	519.967	501.956
988	10	GTP	519.967	501.956
989	11	AMP	346.055	328.044	C10H12N5O7P1	5
990	12	AMP group	346.055	328.044
991	13	dGMP	346.055	328.044
992	14	8-oxo-dGMP	362.05	344.039	C10H12N5O8P1	6
993	15	GMP	362.05	344.039
994	16	eugenol	165.091	147.08	C10H12O2	7
995	17	isoeugenol	165.091	147.08
996	18	propyl benzoate	165.091	147.08
997	19	N-methylmyosmine	162.115	144.105	C10H13N2	8
998	20	tryptamine	162.115	144.105
999	21	(-)-carvone	151.112	133.101	C10H14O1	9
1000	22	(-)-isopiperitenone	151.112	133.101
1001	23	(+)-menthofuran	151.112	133.101
1002	24	(4S)-perillyl aldehyde	151.112	133.101
1003	25	a carvone	151.112	133.101
1004	26	perillyl aldehyde	151.112	133.101
1005	27	(-)-α-pinene	137.132	119.122	C10H16	10
1006	28	(-)-β-phellandrene	137.132	119.122
1007	29	(-)-β-pinene	137.132	119.122
1008	30	(+)-2-carene	137.132	119.122
1009	31	(+)-camphene	137.132	119.122
1010	32	(4S)-limonene	137.132	119.122
1011	33	(E)-β-ocimene	137.132	119.122
1012	34	(Z)-β-ocimene	137.132	119.122
1013	35	3-carene	137.132	119.122
1014	36	an α-pinene	137.132	119.122
1015	37	limonene	137.132	119.122
1016	38	pinene	137.132	119.122
1017	39	sabinene	137.132	119.122
1018	40	terpinolene	137.132	119.122
1019	41	tricyclene	137.132	119.122
1020	42	α-phellandrene	137.132	119.122
1021	43	α-terpinene	137.132	119.122
1022	44	β-myrcene	137.132	119.122
1023	45	β-phellandrene	137.132	119.122
1024	46	(-)-trans-carveol	153.127	135.117	C10H16O1	11
1025	47	(-)-trans-isopiperitenol	153.127	135.117
1026	48	(+)-camphor	153.127	135.117
1027	49	(+)-pulegone	153.127	135.117
1028	50	(4S)-perillyl alcohol	153.127	135.117
1029	51	a (4R)-1,2-epoxymenth-8-ene	153.127	135.117
1030	52	a (4S)-1,2-epoxymenth-8-ene	153.127	135.117
1031	53	a (6S)-carveol	153.127	135.117
1032	54	a carveol	153.127	135.117
1033	55	a dihydrocarvone	153.127	135.117
1034	56	a limonene-1,2-epoxide	153.127	135.117
1035	57	an ipsdienol	153.127	135.117
1036	58	an isodihydrocarvone	153.127	135.117
1037	59	camphor	153.127	135.117
1038	60	geranial	153.127	135.117
1039	61	neral	153.127	135.117
1040	62	perillyl alcohol	153.127	135.117
1041	63	(6E)-8-hydroxygeranial	169.122	151.112	C10H16O2	12
1042	64	(6E)-8-oxogeraniol	169.122	151.112
1043	65	a 1-hydroxymenth-8-en-2-one	169.122	151.112
1044	66	a 4-isopropenyl-7-methyloxepan-2-one	169.122	151.112
1045	67	a 6-isopropenyl-3-methyloxepan-2-one	169.122	151.112
1046	68	8-methyl-6-nonenoate	170.13	152.12	C10H17O2	13
1047	69	citronellate	170.13	152.12
1048	70	(+)-bornyl-diphosphate	312.052	294.042	C10H17O7P2	14
1049	71	geranyl diphosphate	312.052	294.042
1050	72	neryl diphosphate	312.052	294.042
1051	73	(-)-(4S)-α-terpineol	155.143	137.132	C10H18O1	15
1052	74	(-)-menthone	155.143	137.132
1053	75	(+)-borneol	155.143	137.132
1054	76	(3R)-linalool	155.143	137.132
1055	77	(3S)-linalool	155.143	137.132
1056	78	(RS)-linalool	155.143	137.132
1057	79	1,8-cineole	155.143	137.132
1058	80	a dihydrocarveol	155.143	137.132
1059	81	a menthone	155.143	137.132
1060	82	citronellal	155.143	137.132
1061	83	geraniol	155.143	137.132
1062	84	α-terpineol	155.143	137.132
1063	85	(6E)-8-hydroxygeraniol	171.138	153.127	C10H18O2	16
1064	86	a 7-isopropyl-4-methyloxepan-2-one	171.138	153.127
1065	87	a limonene-1,2-diol	171.138	153.127
1066	88	(-)-menthol	157.159	139.148	C10H20O1	17
1067	89	(+)-neomenthol	157.159	139.148
1068	90	citronellol	157.159	139.148
1069	91	spermine	207.254	189.244	C10H30N4	18
1070	92	thermospermine	207.254	189.244
1071	93	chorismate	225.039	207.029	C10H8O6	19
1072	94	isochorismate	225.039	207.029
1073	95	prephenate	225.039	207.029
1074	96	(E)-6'-hydroxyferulate	210.052	192.042	C10H9O5	20
1075	97	(Z)-6'-hydroxyferulate	210.052	192.042
1076	98	butyl benzoate	179.107	161.096	C11H14O2	21
1077	99	isomethyleugenol	179.107	161.096
1078	100	methyleugenol	179.107	161.096
1079	101	4'-phosphopantetheine	357.088	339.077	C11H21N2O7P1S1	22
1080	102	4'-phosphopantetheine group	357.088	339.077
1081	103	angelicin	187.039	169.028	C11H6O3	23
1082	104	psoralen	187.039	169.028
1083	105	7-[(2S)-2-amino-2-carboxylatoethyl]-5-hydroxy-2H-1,4-benzothiazine-3-carboxylate	296.046	278.036	C12H11N2O5S1	24
1084	106	8-[(2S)-2-amino-2-carboxylatoethyl]-5-hydroxy-2H-1,4-benzothiazine-3-carboxylate	296.046	278.036
1085	107	2-S-cysteinyldopaquinone	315.065	297.054	C12H14N2O6S1	25
1086	108	5-S-cysteinyldopaquinone	315.065	297.054
1087	109	2-S-cysteinyldopa	317.08	299.07	C12H16N2O6S1	26
1088	110	5-S-cysteinyldopa	317.08	299.07
1089	111	a 12-hydroxyjasmonate sulfate	305.069	287.058	C12H16O7S1	27
1090	112	an 11-hydroxyjasmonate sulfate	305.069	287.058
1091	113	cis-12-sulfojasmonate	305.069	287.058
1092	114	11-hydroxydodecanoate	216.172	198.161	C12H23O3	28
1093	115	12-hydroxylaurate	216.172	198.161
1094	116	7-hydroxylaurate	216.172	198.161
1095	117	(4-octanoyl-5-oxo-2H-furan-3-yl)methyl phosphate	319.094	301.084	C13H19O7P1	29
1096	118	[4-(6-methylheptanoyl)-5-oxo-2H-furan-3-yl]methyl phosphate	319.094	301.084
1097	119	N-acetyl-7-O-acetylneuraminate	351.116	333.105	C13H20N1O10	30
1098	120	N-acetyl-9-O-acetylneuraminate	351.116	333.105
1099	121	(-)-methyl jasmonate	225.149	207.138	C13H20O3	31
1100	122	a methyl jasmonate	225.149	207.138
1101	123	[(3S)-4-octanoyl-5-oxooxolan-3-yl]methyl phosphate	321.11	303.099	C13H21O7P1	32
1102	124	2-isocapryloyl-3S-(phosphooxy)methyl-γ-butyrolactone phosphate	321.11	303.099
1103	125	UDP-D-apiose	535.036	517.026	C14H20N2O16P2	33
1104	126	UDP-D-xylose	535.036	517.026
1105	127	UDP-L-arabinofuranose	535.036	517.026
1106	128	UDP-L-arabinopyranose	535.036	517.026
1107	129	UDP-L-arabinose	535.036	517.026
1108	130	UDP-α-D-xylose	535.036	517.026
1109	131	UDP-β-L-arabinofuranose	535.036	517.026
1110	132	UDP-β-L-arabinopyranose	535.036	517.026
1111	133	chondroitin sulfate disaccharide	556.027	538.017	C14H21N1O18S2	34
1112	134	dermatan sulfate disaccharide	556.027	538.017
1113	135	2,5,7-trihydroxyflavanone	272.068	254.057	C15H11O5	35
1114	136	p-coumaroyltriacetic acid lactone	272.068	254.057
1115	137	1-(4-hydroxyphenyl)-3-(2,4,6-trihydroxyphenyl)propane-1,3-dione	288.063	270.052	C15H11O6	36
1116	138	2-hydroxynaringenin	288.063	270.052
1117	139	(+)-taxifolin	304.058	286.047	C15H11O7	37
1118	140	1-(3,4-dihydroxyphenyl)-3-(2,4,6-trihydroxyphenyl)propane-1,3-dione	304.058	286.047
1119	141	(2S)-liquiritigenin	257.081	239.07	C15H12O4	38
1120	142	(6aR,11aR)-3,9-dihydroxypterocarpan	257.081	239.07
1121	143	isoliquiritigenin	257.081	239.07
1122	144	(+)-dihydrokaempferol	289.071	271.06	C15H12O6	39
1123	145	2,4',5,7-tetrahydroxyisoflavanone	289.071	271.06
1124	146	UDP-α-D-galacturonate	578.018	560.008	C15H19N2O18P2	40
1125	147	UDP-α-D-glucuronate	578.018	560.008
1126	148	UDP-4-dehydro-6-deoxy-α-D-glucose	547.036	529.026	C15H20N2O16P2	41
1127	149	UDP-4-dehydro-β-L-rhamnose	547.036	529.026
1128	150	cis-zeatin riboside monophosphate	430.112	412.102	C15H20N5O8P1	42
1129	151	trans-zeatin riboside monophosphate	430.112	412.102
1130	152	(+)-costunolide (12,6α)	233.154	215.143	C15H20O2	43
1131	153	8-epi-inunolide	233.154	215.143
1132	154	a farnesoate	233.154	215.143
1133	155	inunolide	233.154	215.143
1134	156	(-)-arteannuin B	249.149	231.138	C15H20O3	44
1135	157	(+)-cis-abscisic aldehyde	249.149	231.138
1136	158	(+)-trans-abscisic aldehyde	249.149	231.138
1137	159	artemisinate	234.161	216.151	C15H21O2	45
1138	160	germacra-1(10),4,11(13)-trien-12-oate	234.161	216.151
1139	161	UDP-D-glucose	565.047	547.036	C15H22N2O17P2	46
1140	162	UDP-α-D-galactofuranose	565.047	547.036
1141	163	UDP-α-D-galactose	565.047	547.036
1142	164	UDP-α-D-glucose	565.047	547.036
1143	165	artemisinic aldehyde	219.174	201.164	C15H22O1	47
1144	166	germacra-1(10),4,11(13)-trien-12-al	219.174	201.164
1145	167	solavetivone	219.174	201.164
1146	168	2-cis,4-trans-xanthoxin	251.164	233.154	C15H22O3	48
1147	169	cis-abscisic alcohol	251.164	233.154
1148	170	trans-abscisic alcohol	251.164	233.154
1149	171	(R)-S-adenosyl-L-methionine	400.152	382.142	C15H23N6O5S1	49
1150	172	S-adenosyl-L-methionine	400.152	382.142
1151	173	(-)-germacrene D	205.195	187.185	C15H24	50
1152	174	(-)-vetispiradiene	205.195	187.185
1153	175	(-)-β-caryophyllene	205.195	187.185
1154	176	(-)-β-elemene	205.195	187.185
1155	177	(+)-5-epi-aristolochene	205.195	187.185
1156	178	(+)-amorpha-4,11-diene	205.195	187.185
1157	179	(+)-germacrene A	205.195	187.185
1158	180	(+)-germacrene D	205.195	187.185
1159	181	(+)-valencene	205.195	187.185
1160	182	(+)-γ-muurolene	205.195	187.185
1161	183	(E)-β-farnesene	205.195	187.185
1162	184	(E,E)-germacrene B	205.195	187.185
1163	185	(E,E)-α-farnesene	205.195	187.185
1164	186	(Z,E)-α-farnesene	205.195	187.185
1165	187	7-epi-α-selinene	205.195	187.185
1166	188	a δ-selinene	205.195	187.185
1167	189	germacrene A	205.195	187.185
1168	190	germacrene C	205.195	187.185
1169	191	sesquisabinene	205.195	187.185
1170	192	viridiflorene	205.195	187.185
1171	193	α-humulene	205.195	187.185
1172	194	(2E,6E)-farnesal	221.19	203.179	C15H24O1	51
1173	195	10-hydroxy-α-humulene	221.19	203.179
1174	196	1-deoxycapsidiol	221.19	203.179
1175	197	3-deoxycapsidiol	221.19	203.179
1176	198	artemisinic alcohol	221.19	203.179
1177	199	germacra-1(10),4,11(13)-trien-12-ol	221.19	203.179
1178	200	solavetivol	221.19	203.179
1179	201	(2E,6E)-farnesyl diphosphate	380.115	362.104	C15H25O7P2	52
1180	202	(2Z,6Z)-farnesyl diphosphate	380.115	362.104
1181	203	quercetin-3,3'-bissulfate	459.94	441.93	C15H7O13S2	53
1182	204	quercetin-3,4'-bissulfate	459.94	441.93
1183	205	quercetin 3, 4', 7-trisulfate	539.897	521.886	C15H7O16S3	54
1184	206	quercetin 3,3',7-trissulfate	539.897	521.886
1185	207	apigenin	270.052	252.042	C15H9O5	55
1186	208	genistein	270.052	252.042
1187	209	cyanidin	286.047	268.037	C15H9O6	56
1188	210	kaempferol	286.047	268.037
1189	211	3-O-methylquercetin	316.058	298.047	C16H11O7	57
1190	212	isorhamnetin	316.058	298.047
1191	213	a 4'-methoxyisoflavone	253.086	235.075	C16H12O3	58
1192	214	a rotenoid	253.086	235.075
1193	215	2-hydroxyformononetin	285.076	267.065	C16H12O5	59
1194	216	calycosin	285.076	267.065
1195	217	genkwanin	285.076	267.065
1196	218	maackiain	285.076	267.065
1197	219	(S)-norcoclaurine	273.136	255.125	C16H18N1O3	60
1198	220	norcoclaurine	273.136	255.125
1199	221	1-O-(indol-3-ylacetyl)-β-D-glucose	338.123	320.113	C16H19N1O7	61
1200	222	4-O-(indol-3-ylacetyl)-β-D-glucose	338.123	320.113
1201	223	6-O-(indol-3-ylacetyl)-β-D-glucose	338.123	320.113
1202	224	(indol-3-yl)acetyl-L-isoleucine	288.147	270.136	C16H19N2O3	62
1203	225	(indol-3-yl)acetyl-L-leucine	288.147	270.136
1204	226	GDP-4-dehydro-6-deoxy-β-L-galactose	586.058	568.048	C16H21N5O15P2	63
1205	227	GDP-4-dehydro-α-D-rhamnose	586.058	568.048
1206	228	dTDP-4-dehydro-6-deoxy-D-galactose	545.057	527.046	C16H22N2O15P2	64
1207	229	dTDP-4-dehydro-6-deoxy-α-D-glucopyranose	545.057	527.046
1208	230	dTDP-4-dehydro-β-L-rhamnose	545.057	527.046
1209	231	ADP-α-D-glucose	588.074	570.063	C16H23N5O15P2	65
1210	232	GDP-L-fucose	588.074	570.063
1211	233	GDP-β-L-fucose	588.074	570.063
1212	234	GDP-α-D-mannose	604.069	586.058	C16H23N5O16P2	66
1213	235	GDP-β-L-galactose	604.069	586.058
1214	236	GDP-β-L-gulose	604.069	586.058
1215	237	dihydrozeatin-7-N-glucose	384.188	366.177	C16H25N5O6	67
1216	238	dihydrozeatin-9-N-glucoside	384.188	366.177
1217	239	dihydrozeatin-O-glucoside	384.188	366.177
1218	240	16-hydroxypalmitate	272.235	254.224	C16H31O3	68
1219	241	2-hydroxyhexadecanoate	272.235	254.224
1220	242	3',4'-dimethylmyricetin	346.068	328.058	C17H13O8	69
1221	243	syringetin	346.068	328.058
1222	244	UDP-2-acetamido-2,6-dideoxy-α-D-xylo-hex-4-ulose	588.063	570.052	C17H23N3O16P2	70
1223	245	UDP-2-acetamido-2,6-dideoxy-β-L-arabino-hex-4-ulose	588.063	570.052
1224	246	UDP-2-acetamido-2,6-dideoxy-β-L-lyxo-4-hexulose	588.063	570.052
1225	247	2''-O-acetyl-ADP-ribose	600.074	582.063	C17H23N5O15P2	71
1226	248	3''-O-acetyl-ADP-ribose	600.074	582.063
1227	249	(S)-atropine	291.183	273.172	C17H24N1O3	72
1228	250	atropine	291.183	273.172
1229	251	littorine	291.183	273.172
1230	252	UDP-N-acetyl-α-D-quinovosamine	590.078	572.068	C17H25N3O16P2	73
1231	253	UDP-N-acetyl-β-L-pneumosamine	590.078	572.068
1232	254	4-(2-methylbutanoyl)sucrose	427.181	409.17	C17H30O12	74
1233	255	4-(3-methylbutanoyl)sucrose	427.181	409.17
1234	256	4-coumaroyl-3',4'-dihydroxyphenyllactate	344.089	326.078	C18H15O7	75
1235	257	caffeoyl-4'-hydroxyphenyllactate	344.089	326.078
1236	258	(S)-N-methylcoclaurine	301.167	283.157	C18H22N1O3	76
1237	259	codeine	301.167	283.157
1238	260	benzyl 6-O-β-D-apiofuranosyl-β-D-glucopyranoside	403.16	385.149	C18H26O10	77
1239	261	benzyl alcohol 6-O-β-D-xylopyranosyl-β-D-glucopyranoside	403.16	385.149
1240	262	(9Z,13S,15Z)-12,13-epoxyoctadeca-9,11,15-trienoate	292.203	274.193	C18H27O3	78
1241	263	9,10-epoxy-10,12Z,15Z-octadecatrienoate	292.203	274.193
1242	264	colnelenate	292.203	274.193
1243	265	dinor-12-oxo-phytodienoate	292.203	274.193
1244	266	18-oxo-oleate	296.235	278.224	C18H31O3	79
1245	267	vernolate	296.235	278.224
1246	268	(12Z,15Z)-9,10-dihydroxyoctadeca-12,15-dienoate	312.23	294.219	C18H31O4	80
1247	269	(13S)-HPODE	312.23	294.219
1248	270	(9R)-HPODE	312.23	294.219
1249	271	(9S)-HPODE	312.23	294.219
1250	272	(9Z,12Z)-15,16-dihydroxyoctadeca-9,12-dienoate	312.23	294.219
1251	273	(9Z,15Z)-12,13-dihydroxyoctadeca-9,15-dienoate	312.23	294.219
1252	274	9,10-12,13-diepoxyoctadecanoate	312.23	294.219
1253	275	9-hydroxy-10-oxo-12-octadecenoate	312.23	294.219
1254	276	a vaccenate	282.255	264.245	C18H33O2	81
1255	277	cis-vaccenate	282.255	264.245
1256	278	oleate	282.255	264.245
1257	279	18-hydroxyoleate	298.25	280.24	C18H33O3	82
1258	280	9,10-epoxystearate	298.25	280.24
1259	281	(9Z)-12,13-dihydroxyoctadeca-9-enoate	314.245	296.235	C18H33O4	83
1260	282	9,10-epoxy-18-hydroxystearate	314.245	296.235
1261	283	(9R,10S)-dihydroxystearate	316.261	298.25	C18H35O4	84
1262	284	(9S,10S)-9,10-dihydroxyoctadecanoate	316.261	298.25
1263	285	3-dehydrosphinganine (C18)	301.298	283.287	C18H38N1O2	85
1264	286	sphingosine	301.298	283.287
1265	287	16-epivellosimine	293.165	275.154	C19H20N2O1	86
1266	288	vellosimine	293.165	275.154
1267	289	(1E,2Z)-3-hydroxy-5,9,17-trioxo-4,5:9,10-disecoandrosta-1 (10),2-dien-4-oate	348.157	330.146	C19H23O6	87
1268	290	gibberellin A1	348.157	330.146
1269	291	gibberellin A29	348.157	330.146
1270	292	gibberellin A34	348.157	330.146
1271	293	(S)-norlaudanine	331.178	313.167	C19H24N1O4	88
1272	294	(S)-reticuline	331.178	313.167
1273	295	salutaridinol	331.178	313.167
1274	296	3-hydroxy-9,10-secoandrosta-1,3,5(10)-triene-9,17-dione	301.18	283.169	C19H24O3	89
1275	297	9α-hydroxyandrosta-1,4-diene-3,17-dione	301.18	283.169
1276	298	5α-androstane-3,17-dione	289.216	271.206	C19H28O2	90
1277	299	testosterone	289.216	271.206
1278	300	17-β-hydroxy-5-α-androstan-3-one	291.232	273.221	C19H30O2	91
1279	301	17-β-hydroxyandrostan-3-one	291.232	273.221
1280	302	5-α-androstan-3β,17β-diol	293.248	275.237	C19H32O2	92
1281	303	a 17-α-hydroxysteroid	293.248	275.237
1282	304	a 17-β-hydroxysteroid	293.248	275.237
1283	305	androstan-3α,17β-diol	293.248	275.237
1284	306	(+)-sesamin	355.118	337.107	C20H18O6	93
1285	307	norsolorinate anthrone	355.118	337.107
1286	308	(S)-canadine	340.154	322.144	C20H21N1O4	94
1287	309	papaverine	340.154	322.144
1288	310	gibberellin A13	376.152	358.141	C20H23O7	95
1289	311	gibberellin A17	376.152	358.141
1290	312	(-)-lariciresinol	361.165	343.154	C20H24O6	96
1291	313	(+)-lariciresinol	361.165	343.154
1292	314	(3R,4R)-3,4-bis(4-hydroxy-3-methoxybenzyl)tetrahydro-2-furanol	361.165	343.154
1293	315	gibberellin A19	361.165	343.154
1294	316	gibberellin A36	361.165	343.154
1295	317	lariciresinol	361.165	343.154
1296	318	(S)-laudanine	345.193	327.183	C20H26N1O4	97
1297	319	(S)-tetrahydropapaverine	345.193	327.183
1298	320	gibberellin A110	347.185	329.175	C20H26O5	98
1299	321	gibberellin A15 (open lactone form)	347.185	329.175
1300	322	gibberellin A53	347.185	329.175
1301	323	(-)-secoisolariciresinol	363.18	345.17	C20H26O6	99
1302	324	(+)-secoisolariciresinol	363.18	345.17
1303	325	gibberellin A97	363.18	345.17
1304	326	gibberellin44 (open lactone form)	363.18	345.17
1305	327	secoisolariciresinol	363.18	345.17
1306	328	11-cis-3-hydroxyretinal	301.216	283.206	C20H28O2	100
1307	329	all-trans-3-hydroxyretinal	301.216	283.206
1308	330	abieta-7,13-diene-18-oate	302.224	284.213	C20H29O2	101
1309	331	ent-kaur-16-en-19-oate	302.224	284.213
1310	332	ent-7α-hydroxykaur-16-en-19-oate	318.219	300.208	C20H29O3	102
1311	333	leukotriene A4	318.219	300.208
1312	334	steviol	318.219	300.208
1313	335	11-cis-3-hydroxyretinol	303.232	285.221	C20H30O2	103
1314	336	all-trans-3-hydroxyretinol	303.232	285.221
1315	337	ent-kaurene	273.258	255.247	C20H32	104
1316	338	taxa-4,11-diene	273.258	255.247
1317	339	abieta-7,13-dien-18-ol	289.253	271.242	C20H32O1	105
1318	340	ent-kaurenol	289.253	271.242
1319	341	taxa-4(20),11-dien-5α-ol	289.253	271.242
1320	342	(-)-ent-copalyl diphosphate	448.177	430.167	C20H33O7P2	106
1321	343	2-cis,6-trans,10-trans-geranylgeranyl diphosphate	448.177	430.167
1322	344	geranylgeranyl diphosphate	448.177	430.167
1323	345	(+)-kolavelool	291.268	273.258	C20H34O1	107
1324	346	cis-abienol	291.268	273.258
1325	347	geranylgeraniol	291.268	273.258
1326	348	an 11,13-icosadienoate	308.271	290.26	C20H35O2	108
1327	349	an icosadienoate	308.271	290.26
1328	350	isovitexin	432.105	414.095	C21H19O10	109
1329	351	pelargonidin-3-O-β-D-glucoside	432.105	414.095
1330	352	vitexin	432.105	414.095
1331	353	cyanidin-3-O-β-D-glucoside	448.1	430.089	C21H19O11	110
1332	354	kaempferol 3-O-β-D-galactoside	448.1	430.089
1333	355	kaempferol 3-O-β-D-glucoside	448.1	430.089
1334	356	delphinidin-3-O-β-D-glucoside	464.095	446.084	C21H19O12	111
1335	357	quercetin 3-galactoside	464.095	446.084
1336	358	quercetin 4'-O-glucoside	464.095	446.084
1337	359	quercetin 7-O-glucoside	464.095	446.084
1338	360	quercetin-3-glucoside	464.095	446.084
1339	361	3-C-glucosyl-2,4,4',6-tetrahydroxydibenzoylmethane	450.116	432.105	C21H21O11	112
1340	362	6-C-glucosyl-2-hydroxynaringenin	450.116	432.105
1341	363	perakine	351.17	333.16	C21H22N2O3	113
1342	364	polyneuridine aldehyde	351.17	333.16
1343	365	(+)-7-epi-12-hydroxyjasmonoyl-L-phenylalanine	373.188	355.178	C21H26N1O5	114
1344	366	7-O-acetylsalutaridinol	373.188	355.178
1345	367	1,2-dihydro-β-NADP	742.067	724.057	C21H26N7O17P3	115
1346	368	1,6-dihydro-β-NADP	742.067	724.057
1347	369	NADPH	742.067	724.057
1348	370	1,2-dihydro-β-NAD	664.116	646.106	C21H27N7O14P2	116
1349	371	1,6-dihydro-β-NAD	664.116	646.106
1350	372	NADH	664.116	646.106
1351	373	(R)-NADPHX	760.078	742.067	C21H28N7O18P3	117
1352	374	(S)-NADPHX	760.078	742.067
1353	375	NADPHX	760.078	742.067
1354	376	(R)-NADHX	682.127	664.116	C21H29N7O15P2	118
1355	377	(S)-NADHX	682.127	664.116
1356	378	NADHX	682.127	664.116
1357	379	cannabidiol	315.232	297.221	C21H30O2	119
1358	380	progesterone	315.232	297.221
1359	381	4,5β-dihydrocortisone	363.217	345.206	C21H30O5	120
1360	382	cortisol	363.217	345.206
1361	383	a coenzyme-A group	764.091	746.081	C21H32N7O16P3S1	121
1362	384	coenzyme A	764.091	746.081
1363	385	3-(2-methylbutanoyl)-4-(3-methylbutanoyl)sucrose	511.239	493.228	C22H38O13	122
1364	386	3,4-di(3-methylbutanoyl)sucrose	511.239	493.228
1365	387	11-dehydro-15-oxo spinosyn macrolactone	403.248	385.237	C24H34O5	123
1366	388	spinosyn tricyclic macrolactone	403.248	385.237
1367	389	3-hydroxypropanoyl-CoA	836.112	818.102	C24H36N7O18P3S1	124
1368	390	lactoyl-CoA	836.112	818.102
1369	391	4-hydroxy-2-methyl-3-oxo-4-farnesyl-3,4-dihydroquinoline-1-oxide	396.253	378.243	C25H33N1O3	125
1370	392	4-hydroxy-2-methyl-4-[(2E,6E)-3,7,11-trimethyldodeca-2,6,10-trien-1-yl]quinolin-3(4H)-one 1-oxide	396.253	378.243
1371	393	aurachin C epoxide	396.253	378.243
1372	394	(R)-methylmalonyl-CoA	863.099	845.089	C25H35N7O19P3S1	126
1373	395	(S)-methylmalonyl-CoA	863.099	845.089
1374	396	methylmalonyl-CoA	863.099	845.089
1375	397	succinyl-CoA	863.099	845.089
1376	398	crotonyl-CoA	832.117	814.107	C25H36N7O17P3S1	127
1377	399	methylacrylyl-CoA	832.117	814.107
1378	400	vinylacetyl-CoA	832.117	814.107
1379	401	butanoyl-CoA	834.133	816.122	C25H38N7O17P3S1	128
1380	402	isobutanoyl-CoA	834.133	816.122
1381	403	(3R)-3-hydroxybutanoyl-CoA	850.128	832.117	C25H38N7O18P3S1	129
1382	404	(S)-3-hydroxybutanoyl-CoA	850.128	832.117
1383	405	(S)-3-hydroxy-isobutanoyl-CoA	850.128	832.117
1384	406	3-hydroxybutanoyl-CoA	850.128	832.117
1385	407	3-hydroxy-isobutanoyl-CoA	850.128	832.117
1386	408	(E)-glutaconyl-CoA	875.099	857.089	C26H35N7O19P3S1	130
1387	409	itaconyl-CoA	875.099	857.089
1388	410	(3S)-citramalyl-CoA	893.11	875.099	C26H37N7O20P3S1	131
1389	411	citramalyl-CoA	893.11	875.099
1390	412	(E)-2-methylcrotonoyl-CoA	846.133	828.122	C26H38N7O17P3S1	132
1391	413	3-methylcrotonyl-CoA	846.133	828.122
1392	414	2-methylacetoacetyl-CoA	862.128	844.117	C26H38N7O18P3S1	133
1393	415	3-oxopentanoyl-CoA	862.128	844.117
1394	416	4-oxopentanoyl-CoA	862.128	844.117
1395	417	2-methylbutanoyl-CoA	848.149	830.138	C26H40N7O17P3S1	134
1396	418	isovaleryl-CoA	848.149	830.138
1397	419	(2S,3S)-3-hydroxy-2-methylbutanoyl-CoA	864.144	846.133	C26H40N7O18P3S1	135
1398	420	3-hydroxypentanoyl-CoA	864.144	846.133
1399	421	4-hydroxypentanoyl-CoA	864.144	846.133
1400	422	kaempferol 3-O-β-D-glucosyl-(1->2)-β-D-glucoside	610.153	592.142	C27H29O16	136
1401	423	kaempferol 3-O-β-D-glucosylgalactoside	610.153	592.142
1402	424	4α-carboxy-5α-cholesta-7,24-dien-3β-ol	428.328	410.318	C28H43O3	137
1403	425	4α-carboxy-5α-cholesta-8,24-dien-3β-ol	428.328	410.318
1404	426	4α-carboxy-5α-cholest-7-en-3β-ol	430.344	412.334	C28H45O3	138
1405	427	4α-carboxy-5α-cholesta-8-en-3β-ol	430.344	412.334
1406	428	24-epibrassinolide	481.352	463.342	C28H48O6	139
1407	429	26-hydroxycastasterone	481.352	463.342
1408	430	brassinolide	481.352	463.342
1409	431	(6α)-hydroxycampestanol	419.388	401.378	C28H50O2	140
1410	432	3-epi-6-deoxocathasterone	419.388	401.378
1411	433	6-deoxocathasterone	419.388	401.378
1412	434	6-deoxoteasterone	435.383	417.373	C28H50O3	141
1413	435	6-deoxotyphasterol	435.383	417.373
1414	436	6-deoxocastasterone	451.378	433.368	C28H50O4	142
1415	437	6-hydroxyteasterone	451.378	433.368
1416	438	6-hydroxytyphasterol	451.378	433.368
1417	439	4α-carboxy-4β-methyl-5α-cholesta-8,24-dien-3β-ol	442.344	424.334	C29H45O3	143
1418	440	4α-carboxy-ergosta-7,24(241)-dien-3β-ol	442.344	424.334
1419	441	3β-hydroxy-4β-methyl-5α-cholest-7-ene-4α-carboxylate	444.36	426.349	C29H47O3	144
1420	442	4α-carboxy-4β-methyl-5α-cholesta-8-en-3β-ol	444.36	426.349
1421	443	(E)-4-coumaroyl-CoA	910.128	892.117	C30H38N7O18P3S1	145
1422	444	3-oxo-3-phenylpropanoyl-CoA	910.128	892.117
1423	445	2,4-dihydroxycinnamoyl-CoA	926.123	908.112	C30H38N7O19P3S1	146
1424	446	trans-caffeoyl-CoA	926.123	908.112
1425	447	(R)-3-(phenyl)lactoyl-CoA	912.144	894.133	C30H40N7O18P3S1	147
1426	448	3-hydroxy-3-phenylpropanoyl-CoA	912.144	894.133
1427	449	dihydro-4-coumaroyl-CoA	912.144	894.133
1428	450	4α-carboxy,4β,14α-dimethyl-9β,19-cyclo-5α-cholest-24-en-3β-ol	456.36	438.349	C30H47O3	148
1429	451	4α-carboxy-stigmasta-7,24(241)-dien-3β-ol	456.36	438.349
1430	452	betulinate	456.36	438.349
1431	453	oleanolate	456.36	438.349
1432	454	a phycocyanobilin	585.271	567.26	C33H36N4O6	149
1433	455	a phycoerythrobilin	585.271	567.26
1434	456	a phycoviolobilin	585.271	567.26
1435	457	γ-chaconine	561.402	543.392	C33H54N1O6	150
1436	458	γ-solanine	561.402	543.392
1437	459	3,8-divinyl chlorophyllide a	611.214	593.203	C35H30N4O5Mg1	151
1438	460	protochlorophyllide a	611.214	593.203
1439	461	(S)-3-hydroxy-(5Z)-tetradecenoyl-CoA	988.269	970.258	C35H56N7O18P3S1	152
1440	462	3-oxo-myristoyl-CoA	988.269	970.258
1441	463	bisdemalonylsalvianin	757.197	739.187	C36H36O18	153
1442	464	shisonin	757.197	739.187
1443	465	a hexadecenoyl-CoA (n-C16:1CoA)	1000.31	982.295	C37H60N7O17P3S1	154
1444	466	palmitoleoyl-CoA	1000.31	982.295
1445	467	16-hydroxypalmitoyl-CoA	1018.32	1000.31	C37H62N7O18P3S1	155
1446	468	3-hydroxyhexadecanoyl-CoA	1018.32	1000.31
1447	469	(+)-sesaminol 2-O-β-D-gentiotrioside	857.271	839.26	C38H48O22	156
1448	470	(+)-sesaminol 2-O-β-D-glucosyl (1->2)-O-[β-D-glucosyl (1->6)]-β-D-glucoside	857.271	839.26
1449	471	malonylshisonin	842.19	824.179	C39H37O21	157
1450	472	monodemalonylsalvianin	842.19	824.179
1451	473	18-hydroxylinoleoyl-CoA	1042.32	1024.31	C39H62N7O18P3S1	158
1452	474	18-oxo-oleoyl-CoA	1042.32	1024.31
1453	475	(2E)-octadec-2-enoyl-CoA	1028.34	1010.33	C39H64N7O17P3S1	159
1454	476	an octadecenoyl-CoA (n-C18:1CoA)	1028.34	1010.33
1455	477	oleoyl-CoA	1028.34	1010.33
1456	478	(3R)-3-hydroxyoctadecanoyl-CoA	1046.35	1028.34	C39H66N7O18P3S1	160
1457	479	18-hydroxystearoyl-CoA	1046.35	1028.34
1458	480	hydroxypyruvate	104.01		C3H3O4	161
1459	481	tartronate semialdehyde	104.01
1460	482	(2R)-phospho-3-sulfolactate	246.931	228.92	C3H3O9P1S1	162
1461	483	(RS)-phospho-3-sulfolactate	246.931	228.92
1462	484	2-O-sulfonatolactate	168.98	150.97	C3H4O6S1	163
1463	485	3-sulfolactate	168.98	150.97
1464	486	2-phospho-D-glycerate	183.977	165.966	C3H4O7P1	164
1465	487	3-phospho-D-glycerate	183.977	165.966
1466	488	D-serine	106.05		C3H7N1O3	165
1467	489	L-serine	106.05
1468	490	serine	106.05
1469	491	glycerol 1-phosphate	171.005	152.995	C3H7O6P1	166
1470	492	sn-glycerol 3-phosphate	171.005	152.995
1471	493	uroporphyrinogen-I	829.22	811.209	C40H36N4O16	167
1472	494	uroporphyrinogen-III	829.22	811.209
1473	495	cyanidin 3-O-glucoside-7-O-(6-O-(4-O-(glucosyl)-oxybenzoyl)-glucoside)	893.235	875.224	C40H44O23	168
1474	496	delphinidin 3-O-rutinoside-7-O-(6-O-(p-hydroxybenzoyl)-glucoside)	893.235	875.224
1475	497	3,4,3',4'-tetradehydroisozeaxanthin	565.404	547.393	C40H52O2	169
1476	498	canthaxanthin	565.404	547.393
1477	499	7,9,9'-cis-neurosporene	539.461	521.451	C40H58	170
1478	500	all-trans neurosporene	539.461	521.451
1479	501	β-zeacarotene	539.461	521.451
1480	502	all-trans-octaprenyl diphosphate	720.428	702.417	C40H65O7P2	171
1481	503	prephytoene diphosphate	720.428	702.417
1482	504	icosanoyl-CoA	1058.38	1040.37	C41H70N7O17P3S1	172
1483	505	phytanoyl-CoA	1058.38	1040.37
1484	506	(3R)-3-hydroxy-arachidoyl-CoA	1074.38	1056.37	C41H70N7O18P3S1	173
1485	507	2-hydroxyphytanoyl-CoA	1074.38	1056.37
1486	508	22-oxo-docosanoyl-CoA	1100.39	1082.38	C43H72N7O18P3S1	174
1487	509	3-oxobehenoyl-CoA	1100.39	1082.38
1488	510	1-18:2-2-16:3-monogalactosyldiacylglycerol	749.52	731.509	C43H72O10	175
1489	511	1-18:3-2-16:2-monogalactosyldiacylglycerol	749.52	731.509
1490	512	(3R)-3-hydroxybehenoyl-CoA	1102.41	1084.4	C43H74N7O18P3S1	176
1491	513	22-hydroxy-docosanoyl-CoA	1102.41	1084.4
1492	514	1-18:1-2-16:3-monogalactosyldiacylglycerol	751.535	733.525	C43H74O10	177
1493	515	1-18:2-2-16:2-monogalactosyldiacylglycerol	751.535	733.525
1494	516	1-18:3-2-16:1-monogalactosyldiacylglycerol	751.535	733.525
1495	517	1-18:1-2-16:2-monogalactosyldiacylglycerol	753.551	735.541	C43H76O10	178
1496	518	1-18:2-2-16:1-monogalactosyldiacylglycerol	753.551	735.541
1497	519	1-18:3-2-16:0-monogalactosyldiacylglycerol	753.551	735.541
1498	520	1-18:1-2-16:1-monogalactosyldiacylglycerol	755.567	737.556	C43H78O10	179
1499	521	1-18:2-2-16:0-monogalactosyldiacylglycerol	755.567	737.556
1500	522	1-18:2-2-18:3-monogalactosyldiacylglycerol	777.551	759.541	C45H76O10	180
1501	523	1-18:3-2-18:2-monogalactosyldiacylglycerol	777.551	759.541
1502	524	(3R)-3-hydroxylignoceroyl-CoA	1130.44	1112.43	C45H78N7O18P3S1	181
1503	525	3-hydroxytetracosanoyl-CoA	1130.44	1112.43
1504	526	1-16:0-2-18:3-digalactosyldiacylglycerol	915.604	897.593	C49H86O15	182
1505	527	1-18:3-2-16:0-digalactosyldiacylglycerol	915.604	897.593
1506	528	1-16:0-2-18:2-digalactosyldiacylglycerol	917.62	899.609	C49H88O15	183
1507	529	1-18:2-2-16:0-digalactosyldiacylglycerol	917.62	899.609
1508	530	(RS)-malate	133.013	115.003	C4H4O5	184
1509	531	(S)-malate	133.013	115.003
1510	532	(2Z)-2-aminobut-2-enoate	101.047		C4H6N1O2	185
1511	533	2-iminobutanoate	101.047
1512	534	D-aspartate	133.037	115.026	C4H6N1O4	186
1513	535	L-aspartate	133.037	115.026
1514	536	3-hydroxyaspartate	149.032	131.021	C4H6N1O5	187
1515	537	3-hydroxy-D-aspartate	149.032	131.021
1516	538	3-hydroxy-L-aspartate	149.032	131.021
1517	539	1-aminocyclopropane-1-carboxylate	102.055		C4H7N1O2	188
1518	540	azetidine-2-carboxylate	102.055
1519	541	(S)-3-hydroxy-isobutanoate	104.047		C4H7O3	189
1520	542	2-hydroxybutanoate	104.047
1521	543	3-hydroxybutanoate	104.047
1522	544	3-hydroxy-isobutanoate	104.047
1523	545	4-hydroxybutanoate	104.047
1524	546	D-erythrose 4-phosphate	199	180.99	C4H7O7P1	190
1525	547	erythrulose 1-phosphate	199	180.99
1526	548	L-threonine 3-O-phosphate	198.016	180.006	C4H8N1O6P1	191
1527	549	O-phospho-L-homoserine	198.016	180.006
1528	550	1-18:2-2-18:3-digalactosyldiacylglycerol	939.604	921.593	C51H86O15	192
1529	551	1-18:3-2-18:2-digalactosyldiacylglycerol	939.604	921.593
1530	552	di-trans,octa-cis-undecaprenyl diphosphate	924.616	906.605	C55H89O7P2	193
1531	553	tri-trans,hepta-cis-undecaprenyl diphosphate	924.616	906.605
1532	554	all-trans-undecaprenyl group	751.712	733.701	C55H90	194
1533	555	di-trans,octa-cis-undecaprenyl group	751.712	733.701
1534	556	ethyl propanoate	103.075		C5H10O2	195
1535	557	propyl acetate	103.075
1536	558	5-aminopentanoate	118.086	100.076	C5H11N1O2	196
1537	559	DL-norvaline	118.086	100.076
1538	560	glycine betaine	118.086	100.076
1539	561	L-norvaline	118.086	100.076
1540	562	L-valine	118.086	100.076
1541	563	N,N-dimethyl-β-alanine	118.086	100.076
1542	564	betaine aldehyde	103.099		C5H12N1O1	197
1543	565	N-methylaminobutanal	103.099
1544	566	L-ornithine	134.105	116.094	C5H13N2O2	198
1545	567	ornithine	134.105	116.094
1546	568	(2Z)-2-hydroxypenta-2,4-dienoate	114.031		C5H5O3	199
1547	569	(3E)-2-oxopent-3-enoate	114.031
1548	570	2-oxopent-4-enoate	114.031
1549	571	(S)-1-pyrroline-5-carboxylate	113.047		C5H6N1O2	200
1550	572	1-pyrroline-2-carboxylate	113.047
1551	573	1-pyrroline-5-carboxylate	113.047
1552	574	1-pyrroline-4-hydroxy-2-carboxylate	129.042	111.031	C5H6N1O3	201
1553	575	5-oxo-L-proline	129.042	111.031
1554	576	2-hydroxy-5-oxoproline	145.037	127.026	C5H6N1O4	202
1555	577	2-oxoglutaramate	145.037	127.026
1556	578	(S)-2-acetolactate	132.042	114.031	C5H7O4	203
1557	579	4-hydroxy-2-oxopentanoate	132.042	114.031
1558	580	D-glutamate	147.053	129.042	C5H8N1O4	204
1559	581	glutamate	147.053	129.042
1560	582	L-glutamate	147.053	129.042
1561	583	3-methyl-4-cis-hydroxy-2-butenal	101.06		C5H8O2	205
1562	584	3-methyl-4-trans-hydroxy-2-butenal	101.06
1563	585	D-arabinono-1,4-lactone	149.044	131.034	C5H8O5	206
1564	586	D-xylono-1,5-lactone	149.044	131.034
1565	587	2-methylbutanoate	102.068		C5H9O2	207
1566	588	isovalerate	102.068
1567	589	isopentenyl diphosphate	243.99	225.979	C5H9O7P2	208
1568	590	prenyl diphosphate	243.99	225.979
1569	591	2-carboxy-D-arabinitol 1-phosphate	274.008	255.998	C6H10O10P1	209
1570	592	D-gluconate 6-phosphate	274.008	255.998
1571	593	D-myo-inositol (1,4)-bisphosphate	336.972	318.961	C6H10O12P2	210
1572	594	D-myo-inositol (3,4)-bisphosphate	336.972	318.961
1573	595	glucose-1,6-bisphosphate	336.972	318.961
1574	596	α-glucose 1,6-bisphosphate	336.972	318.961
1575	597	β-D-fructose 1,6-bisphosphate	336.972	318.961
1576	598	β-D-fructose 2,6-bisphosphate	336.972	318.961
1577	599	N,3-O-disulfo-D-glucosamine	337.985	319.974	C6H11N1O11S2	211
1578	600	N,6-O-disulfo-D-glucosamine	337.985	319.974
1579	601	2-carboxy-D-arabinitol	196.058	178.047	C6H11O7	212
1580	602	aldehydo-L-galactonate	196.058	178.047
1581	603	D-gluconate	196.058	178.047
1582	604	5-(methylsulfanyl)-ribulose 1-phosphate	259.004	240.993	C6H11O7P1S1	213
1583	605	S-methyl-5-thio-α-D-ribose 1-phosphate	259.004	240.993
1584	606	6-deoxy-6-sulfo-D-fructose	244.025	226.014	C6H11O8S1	214
1585	607	6-sulfo-D-quinovose	244.025	226.014
1586	608	6-sulfo-α-D-quinovose	244.025	226.014
1587	609	α-L-rhamnopyranose 3-sulfate	244.025	226.014
1588	610	1D-myo-inositol 3-monophosphate	259.021	241.011	C6H11O9P1	215
1589	611	1D-myo-inositol 4-monophosphate	259.021	241.011
1590	612	an inositol phosphate	259.021	241.011
1591	613	an α-hexose 1-phosphate	259.021	241.011
1592	614	D-fructofuranose 1-phosphate	259.021	241.011
1593	615	D-fructofuranose 6-phosphate	259.021	241.011
1594	616	D-fructopyranose 1-phosphate	259.021	241.011
1595	617	D-galactopyranose 6-phosphate	259.021	241.011
1596	618	D-glucopyranose 6-phosphate	259.021	241.011
1597	619	D-glucose 1-phosphate	259.021	241.011
1598	620	D-hexose 6-phosphate	259.021	241.011
1599	621	D-mannopyranose 6-phosphate	259.021	241.011
1600	622	D-mannose 6-phosphate	259.021	241.011
1601	623	keto-D-fructose 6-phosphate	259.021	241.011
1602	624	L-sorbofuranose 1-phosphate	259.021	241.011
1603	625	L-sorbopyranose 1-phosphate	259.021	241.011
1604	626	α-D-galactose 1-phosphate	259.021	241.011
1605	627	α-D-galactose 6-phosphate	259.021	241.011
1606	628	α-D-glucopyranose 1-phosphate	259.021	241.011
1607	629	α-D-glucose 6-phosphate	259.021	241.011
1608	630	α-D-mannopyranose 6-phosphate	259.021	241.011
1609	631	α-D-mannose 1-phosphate	259.021	241.011
1610	632	β-D-fructofuranose 1-phosphate	259.021	241.011
1611	633	β-D-fructofuranose 6-phosphate	259.021	241.011
1612	634	β-D-galactose 6-phosphate	259.021	241.011
1613	635	β-D-glucopyranose 1-phosphate	259.021	241.011
1614	636	β-D-glucose 6-phosphate	259.021	241.011
1615	637	β-D-mannopyranose 6-phosphate	259.021	241.011
1616	638	β-L-galactose 1-phosphate	259.021	241.011
1617	639	β-L-gulose 1-phosphate	259.021	241.011
1618	640	cystine	241.031	223.021	C6H12N2O4S2	216
1619	641	D-cystine	241.031	223.021
1620	642	L-cystine	241.031	223.021
1621	643	(3Z)-hex-3-en-1-ol	101.096		C6H12O1	217
1622	644	(E)-2-hexenol	101.096
1623	645	1-hexanal	101.096
1624	646	hexan-3-one	101.096
1625	647	aldehydo-D-galactose	181.071	163.06	C6H12O6	218
1626	648	aldehydo-D-mannose	181.071	163.06
1627	649	an inositol	181.071	163.06
1628	650	D-allofuranose	181.071	163.06
1629	651	D-allopyranose	181.071	163.06
1630	652	D-allose	181.071	163.06
1631	653	D-altropyranose	181.071	163.06
1632	654	D-fructofuranose	181.071	163.06
1633	655	D-fructopyranose	181.071	163.06
1634	656	D-fructose	181.071	163.06
1635	657	D-galactofuranose	181.071	163.06
1636	658	D-galactopyranose	181.071	163.06
1637	659	D-galactose	181.071	163.06
1638	660	D-glucopyranose	181.071	163.06
1639	661	D-glucose	181.071	163.06
1640	662	D-gulopyranose	181.071	163.06
1641	663	D-idopyranose	181.071	163.06
1642	664	D-mannopyranose	181.071	163.06
1643	665	D-mannose	181.071	163.06
1644	666	D-tagatofuranose	181.071	163.06
1645	667	D-tagatose	181.071	163.06
1646	668	D-talopyranose	181.071	163.06
1647	669	hamamelose	181.071	163.06
1648	670	keto-D-fructose	181.071	163.06
1649	671	keto-D-psicose	181.071	163.06
1650	672	keto-D-sorbose	181.071	163.06
1651	673	keto-D-tagatose	181.071	163.06
1652	674	keto-L-sorbose	181.071	163.06
1653	675	L-fructofuranose	181.071	163.06
1654	676	L-fructopyranose	181.071	163.06
1655	677	L-fructose	181.071	163.06
1656	678	L-galactopyranose	181.071	163.06
1657	679	L-gulopyranose	181.071	163.06
1658	680	L-mannopyranose	181.071	163.06
1659	681	L-mannose	181.071	163.06
1660	682	L-sorbofuranose	181.071	163.06
1661	683	L-sorbopyranose	181.071	163.06
1662	684	L-sorbose	181.071	163.06
1663	685	myo-inositol	181.071	163.06
1664	686	scyllo-inositol	181.071	163.06
1665	687	α-D-fructofuranose	181.071	163.06
1666	688	α-D-galactofuranose	181.071	163.06
1667	689	α-D-galactopyranose	181.071	163.06
1668	690	α-D-glucopyranose	181.071	163.06
1669	691	α-D-mannopyranose	181.071	163.06
1670	692	α-L-galactopyranose	181.071	163.06
1671	693	β-D-fructofuranose	181.071	163.06
1672	694	β-D-fructopyranose	181.071	163.06
1673	695	β-D-galactopyranose	181.071	163.06
1674	696	β-D-glucopyranose	181.071	163.06
1675	697	β-D-mannopyranose	181.071	163.06
1676	698	β-L-galactopyranose	181.071	163.06
1677	699	D-galactosamine 6-phosphate	259.045	241.035	C6H13N1O8P1	219
1678	700	D-glucosamine 6-phosphate	259.045	241.035
1679	701	α-D-glucosamine 1-phosphate	259.045	241.035
1680	702	D-galactosamine	181.094	163.084	C6H14N1O5	220
1681	703	D-glucosamine	181.094	163.084
1682	704	D-mannosamine	181.094	163.084
1683	705	D-lysine	148.121	130.11	C6H15N2O2	221
1684	706	L-lysine	148.121	130.11
1685	707	4-hydroxy-L-lysine	164.116	146.105	C6H15N2O3	222
1686	708	5-hydroxy-L-lysine	164.116	146.105
1687	709	cis-aconitate	172	153.99	C6H3O6	223
1688	710	trans-aconitate	172	153.99
1689	711	2-maleylacetate	157.013	139.003	C6H4O5	224
1690	712	3-hydroxy-cis,cis-muconate	157.013	139.003
1691	713	citrate	190.011	172	C6H5O7	225
1692	714	cyclic- 3,4-O-oxalyl-L-threonate	190.011	172
1693	715	cyclic-2,3-O-oxalyl-L-threonate	190.011	172
1694	716	D-threo-isocitrate	190.011	172
1695	717	isocitrate	190.011	172
1696	718	catechol	111.044		C6H6O2	226
1697	719	hydroquinone	111.044
1698	720	1D-myo-inositol 1-diphosphate 2,3,4,5,6-pentakisphosphate	727.733	709.723	C6H6O27P7	227
1699	721	1D-myoinositol 5-diphosphate 1,2,3,4,6-pentakisphosphate	727.733	709.723
1700	722	a diphospho-1D-myo-inositol pentakisphosphate	727.733	709.723
1701	723	1D-myo-inositol 1,5-bis(diphosphate) 2,3,4,6-tetrakisphosphate	806.692	788.681	C6H6O30P8	228
1702	724	3,5-bisdiphosphoinositol-1D-myo-inositol 2,3,4,6-tetrakisphosphate	806.692	788.681
1703	725	a D myo-inositol penta kis phosphate	570.824	552.814	C6H7O21P5	229
1704	726	D-myo-inositol (1,2,3,5,6) pentakisphosphate	570.824	552.814
1705	727	D-myo-inositol (1,2,4,5,6)-pentakisphosphate	570.824	552.814
1706	728	D-myo-inositol 1,3,4,5,6-pentakisphosphate	570.824	552.814
1707	729	4-deoxy-L-threo-hex-4-enopyranuronate	176.032	158.021	C6H7O6	230
1708	730	5-dehydro-4-deoxy-D-glucuronate	176.032	158.021
1709	731	an unsaturated pyranuronate	176.032	158.021
1710	732	L-ascorbate	176.032	158.021
1711	733	monodehydroascorbate radical	176.032	158.021
1712	734	2,3-dioxo-L-gulonate	192.026	174.016	C6H7O7	231
1713	735	2-carboxy-L-xylonolactone	192.026	174.016
1714	736	1-piperideine 6-carboxylate	127.063	109.052	C6H8N1O2	232
1715	737	1-piperideine-2-carboxylate	127.063	109.052
1716	738	α-D-galacturonate 1-phosphate	271.993	253.982	C6H8O10P1	233
1717	739	α-D-glucuronate 1-phosphate	271.993	253.982
1718	740	D-myo-inositol (1,3,4,5)-tetrakisphosphate	492.873	474.863	C6H8O18P4	234
1719	741	D-myo-inositol (1,3,4,6)-tetrakisphosphate	492.873	474.863
1720	742	D-myo-inositol (1,4,5,6)-tetrakisphosphate	492.873	474.863
1721	743	D-myo-inositol (3,4,5,6)-tetrakisphosphate	492.873	474.863
1722	744	2-dehydro-3-deoxy-D-galactonate 6-phosphate	255.998	237.987	C6H8O9P1	235
1723	745	2-dehydro-3-deoxy-D-gluconate 6-phosphate	255.998	237.987
1724	746	D-myo-inositol (1,3,4)-trisphosphate	414.923	396.912	C6H9O15P3	236
1725	747	D-myo-inositol (1,4,5)-trisphosphate	414.923	396.912
1726	748	D-myo-inositol (3,4,6)-trisphosphate	414.923	396.912
1727	749	(S)-2-aceto-2-hydroxybutanoate	146.057	128.047	C6H9O4	237
1728	750	2-dehydropantoate	146.057	128.047
1729	751	3-hydroxy-3-methyl-2-oxopentanoate	146.057	128.047
1730	752	4-hydroxy-2-oxohexanoate	146.057	128.047
1731	753	2-dehydro-3-deoxy-D-galactonate	178.047	160.037	C6H9O6	238
1732	754	2-dehydro-3-deoxy-D-gluconate	178.047	160.037
1733	755	5-dehydro-D-gluconate	194.042	176.032	C6H9O7	239
1734	756	a hexuronate	194.042	176.032
1735	757	a pyranuronate	194.042	176.032
1736	758	aldehydo-D-galacturonate	194.042	176.032
1737	759	aldehydo-D-glucuronate	194.042	176.032
1738	760	D-fructofuranuronate	194.042	176.032
1739	761	D-fructuronate	194.042	176.032
1740	762	D-galactopyranuronate	194.042	176.032
1741	763	D-galacturonate	194.042	176.032
1742	764	D-glucopyranuronate	194.042	176.032
1743	765	D-glucuronate	194.042	176.032
1744	766	D-idopyranuronate	194.042	176.032
1745	767	D-iduronate	194.042	176.032
1746	768	D-mannopyranuronate	194.042	176.032
1747	769	D-mannuronate	194.042	176.032
1748	770	galacturonate	194.042	176.032
1749	771	iduronate	194.042	176.032
1750	772	L-guluronate	194.042	176.032
1751	773	L-idopyranuronate	194.042	176.032
1752	774	L-iduronate	194.042	176.032
1753	775	mannuronate	194.042	176.032
1754	776	α-D-galacturonate	194.042	176.032
1755	777	α-D-glucuronate	194.042	176.032
1756	778	α-D-idopyranuronate	194.042	176.032
1757	779	α-L-idopyranuronate	194.042	176.032
1758	780	β-D-galacturonate	194.042	176.032
1759	781	β-D-glucuronate	194.042	176.032
1760	782	β-D-idopyranuronate	194.042	176.032
1761	783	β-D-mannuronate	194.042	176.032
1762	784	β-L-idopyranuronate	194.042	176.032
1763	785	a cis-keto-C60-meroacyl-adenylate		1195.93	C70H127N5O9P1	240
1764	786	a trans-keto-C61-meroacyl-adenylate		1195.93
1765	787	mesifurane	143.07	125.06	C7H10O3	241
1766	788	mesifurane (enol form)	143.07	125.06
1767	789	4-hydroxybenzoate	138.031	120.021	C7H5O3	242
1768	790	salicylate	138.031	120.021
1769	791	4-aminobenzoate	137.047	119.037	C7H6N1O2	243
1770	792	anthranilate	137.047	119.037
1771	793	2-(2-carboxy-4-methylthiazol-5-yl)ethyl phosphate	264.98	246.97	C7H7N1O6P1S1	244
1772	794	2-[(2R,5Z)-2-carboxy-4-methylthiazol-5(2H)-ylidene]ethyl phosphate	264.98	246.97
1773	795	3-methylcatechol	125.06	107.049	C7H8O2	245
1774	796	guaiacol	125.06	107.049
1775	797	orcinol	125.06	107.049
1776	798	toluquinol	125.06	107.049
1777	799	(2E,4E,6E)-7-hydroxy-4-methylhepta-2,4,6-trienal	139.075	121.065	C8H10O2	246
1778	800	3-methoxy-5-hydroxytoluene	139.075	121.065
1779	801	4-tyrosol	139.075	121.065
1780	802	L-alanyl-D-glutamate	218.09	200.079	C8H13N2O5	247
1781	803	L-alanyl-L-glutamate	218.09	200.079
1782	804	2-dehydro-3-deoxy-D-octonate	238.068	220.058	C8H13O8	248
1783	805	3-deoxy-D-manno-2-octulosonate	238.068	220.058
1784	806	3-deoxy-α-D-manno-2-octulosonate	238.068	220.058
1785	807	3-deoxy-β-D-manno-2-octulosonate	238.068	220.058
1786	808	an N-acetyl-α-D-hexosamine 1-phosphate	300.048	282.037	C8H14N1O9P1	249
1787	809	N-acetyl-D-glucosamine 6-phosphate	300.048	282.037
1788	810	N-acetyl-α-D-galactosamine 1-phosphate	300.048	282.037
1789	811	N-acetyl-α-D-glucosamine 1-phosphate	300.048	282.037
1790	812	hygrine	143.13	125.12	C8H16N1O1	250
1791	813	pseudotropine	143.13	125.12
1792	814	tropine	143.13	125.12
1793	815	4-fumaryl-acetoacetate	199.024	181.013	C8H6O6	251
1794	816	4-maleyl-acetoacetate	199.024	181.013
1795	817	phthalate 3,4-cis-dihydrodiol	199.024	181.013
1796	818	4-hydroxymandelate	168.042	150.031	C8H7O4	252
1797	819	homogentisate	168.042	150.031
1798	820	vanillate	168.042	150.031
1799	821	(4-hydroxyphenyl)acetaldehyde	137.06	119.049	C8H8O2	253
1800	822	methyl benzoate	137.06	119.049
1801	823	chavicol	135.08	117.07	C9H10O1	254
1802	824	cinnamyl alcohol	135.08	117.07
1803	825	(2E,4E,6E)-4-methylocta-2,4,6-trienedial	151.075	133.065	C9H10O2	255
1804	826	4-coumaryl alcohol	151.075	133.065
1805	827	benzyl acetate	151.075	133.065
1806	828	pseudouridine 5'-phosphate	323.027	305.017	C9H11N2O9P1	256
1807	829	UMP	323.027	305.017
1808	830	5-amino-1-(5-phospho-D-ribosyl)imidazole-4-carboxylate	337.031	319.02	C9H11N3O9P1	257
1809	831	N5-carboxyaminoimidazole ribonucleotide	337.031	319.02
1810	832	pseudouridine	245.077	227.066	C9H12N2O6	258
1811	833	uridine	245.077	227.066
1812	834	7,8-dihydromonapterin	256.104	238.093	C9H13N5O4	259
1813	835	7,8-dihydroneopterin	256.104	238.093
1814	836	3-deoxy-D-glycero-D-galacto-non-2-ulopyranosonate	268.079	250.068	C9H15O9	260
1815	837	3-deoxy-D-glycero-α-D-galacto-nonulosonate	268.079	250.068
1816	838	3-deoxy-D-glycero-β-D-galacto-nonulosonate	268.079	250.068
1817	839	5,6-dihydroxyindole-2-carboxylate	193.037	175.026	C9H6N1O4	261
1818	840	L-dopachrome	193.037	175.026
1819	841	a coumarin	147.044	129.033	C9H6O2	262
1820	842	coumarin	147.044	129.033
1821	843	3-phenyl-2-oxopropanoate	164.047	146.036	C9H7O3	263
1822	844	4-coumarate	164.047	146.036
1823	845	coumarinate	164.047	146.036
1824	846	enol-phenylpyruvate	164.047	146.036
1825	847	trans-2-coumarate	164.047	146.036
1826	848	(Z)-3-(2,4-dihydroxyphenyl)-prop-2-enoate	180.042	162.031	C9H7O4	264
1827	849	2,4-dihydroxycinnamate	180.042	162.031
1828	850	3-(4-hydroxyphenyl)pyruvate	180.042	162.031
1829	851	caffeate	180.042	162.031
1830	852	cis-caffeate	180.042	162.031
1831	853	trans-caffeate	180.042	162.031
1832	854	(R)-3-(4-hydroxyphenyl)lactate	182.057	164.047	C9H9O4	265
1833	855	3-(4-hydroxyphenyl)lactate	182.057	164.047
1834	856	methylphoracetophenone	182.057	164.047
1835	857	4-amino-4-deoxychorismate	225.063	207.053	C10H10N1O5	266
1836	858	orotidine 5'-phosphate	366.01	347.999	C10H10N2O11P1	267
1837	859	methylcinnamate	163.075	145.065	C10H10O2	268
1838	860	coniferaldehyde	179.07	161.06	C10H10O3	269
1839	861	adenosine 3',5'-bisphosphate	424.005	405.995	C10H11N5O10P2	270
1840	862	3'-phosphoadenylyl-sulfate	503.962	485.952	C10H11N5O13P2S1	271
1841	863	coniferyl alcohol radical	180.078	162.068	C10H11O3	272
1842	864	inosine	269.088	251.077	C10H12N4O5	273
1843	865	xanthosine	285.083	267.072	C10H12N4O6	274
1844	866	GDP	441.008	422.998	C10H12N5O11P2	275
1845	867	dATP	487.977	469.966	C10H12N5O12P3	276
1846	868	8-oxo-GTP	535.962	517.951	C10H12N5O15P3	277
1847	869	ppGpp	598.925	580.915	C10H12N5O17P4	278
1848	870	pppGpp	677.884	659.873	C10H12N5O20P5	279
1849	871	8-oxo-GMP	378.045	360.034	C10H12N5O9P1	280
1850	872	dADP	409.018	391.008	C10H12N5O9P2	281
1851	873	methylchavicol	149.096	131.086	C10H12O1	282
1852	874	coniferyl alcohol	181.086	163.075	C10H12O3	283
1853	875	petiveriin	228.069	210.058	C10H13N1O3S1	284
1854	876	serotonin	178.11	160.099	C10H13N2O1	285
1855	877	dTDP	400.007	381.996	C10H13N2O11P2	286
1856	878	dTTP	478.965	460.955	C10H13N2O14P3	287
1857	879	porphobilinogen	226.095	208.084	C10H13N2O4	288
1858	880	N6-dimethylallyladenine	204.124	186.114	C10H13N5	289
1859	881	ADP group	426.021	408.01	C10H13N5O10P2	290
1860	882	GDP group	442.016	424.005	C10H13N5O11P2	291
1861	883	adenosine tetraphosphate	583.938	565.927	C10H13N5O16P4	292
1862	884	adenosine pentaphosphate	662.897	644.886	C10H13N5O19P5	293
1863	885	perillate	166.099	148.088	C10H13O2	294
1864	886	triketide pyrone	182.094	164.083	C10H13O3	295
1865	887	7-deoxyloganetate	198.089	180.078	C10H13O4	296
1866	888	dTDP group	401.015	383.004	C10H14N2O11P2	297
1867	889	(6E)-8-oxogeranial	167.107	149.096	C10H14O2	298
1868	890	(S)-nicotine	164.131	146.12	C10H15N2	299
1869	891	pseudooxynicotine	180.126	162.115	C10H15N2O1	300
1870	892	biotin	244.088	226.077	C10H15N2O3S1	301
1871	893	S-sulfinatoglutathione	370.037	352.027	C10H15N3O8S2	302
1872	894	dihydrozeatin	222.135	204.124	C10H15N5O1	303
1873	895	sinigrin	359.034	341.023	C10H16N1O9S2	304
1874	896	S-sulfanylglutathione	339.055	321.045	C10H16N3O6S2	305
1875	897	a 7-hydroxy-4-isopropenyl-7-methyloxepan-2-one	185.117	167.107	C10H16O3	306
1876	898	9-mercaptodethiobiotin	246.103	228.093	C10H17N2O3S1	307
1877	899	geranyl monophosphate	233.094	215.083	C10H17O4P1	308
1878	900	3-hydroxypropyl-glucosinolate	377.044	359.034	C10H18N1O10S2	309
1879	901	(indol-3-yl)acetate	175.063	157.052	C10H8N1O2	310
1880	902	4-methylumbelliferone	177.055	159.044	C10H8O3	311
1881	903	(E)-2-(1H-indol-3-yl)-1-thioacetohydroximate	206.051	188.04	C10H9N2O1S1	312
1882	904	5-enolpyruvoyl-shikimate 3-phosphate	321.001	302.99	C10H9O10P1	313
1883	905	ferulate	194.057	176.047	C10H9O4	314
1884	906	indole-3-lactate	205.073	187.063	C11H10N1O3	315
1885	907	sinapate	224.068	206.057	C11H11O5	316
1886	908	(1S,2R)-1-C-(indol-3-yl)glycerol 3-phosphate	286.048	268.037	C11H12N1O6P1	317
1887	909	β-nicotinate D-ribonucleotide	334.032	316.022	C11H12N1O9P1	318
1888	910	cinnamyl acetate	177.091	159.08	C11H12O2	319
1889	911	m7GTP	534.99	516.98	C11H15N5O14P3	320
1890	912	N7-methylguanosine 5'-phosphate	377.073	359.063	C11H15N5O8P1	321
1891	913	N7-methylguanosine	299.122	281.112	C11H16N5O5	322
1892	914	olivetol	181.122	163.112	C11H16O2	323
1893	915	7-deoxyloganetin	213.112	195.102	C11H16O4	324
1894	916	N-acetyl-D-muramate 6-phosphate	371.061	353.051	C11H17N1O11P1	325
1895	917	(3E)-4,8-dimethylnona-1,3,7-triene	151.148	133.138	C11H18	326
1896	918	ξ-progoitrin	389.044	371.034	C11H18N1O10S2	327
1897	919	N-acetyl-D-muramate	293.111	275.1	C11H18N1O8	328
1898	920	S-(hydroxymethyl)glutathione	337.094	319.083	C11H18N3O7S1	329
1899	921	L-saccharopine	276.132	258.121	C11H19N2O6	330
1900	922	CDP-ethanolamine	446.06	428.049	C11H19N4O11P2	331
1901	923	glucoiberin	423.032	405.022	C11H20N1O10S3	332
1902	924	glucoiberverin	407.037	389.027	C11H20N1O9S3	333
1903	925	1,2-dibutyrin	233.138	215.128	C11H20O5	334
1904	926	3-(methylsulfanyl)propyl-desulfoglucosinolate	328.088	310.078	C11H21N1O6S2	335
1905	927	(E)-1-(L-cysteinylglycin-S-yl)-N-hydroxy-ω-(methylsulfanyl)pentan-1-imine	324.105	306.094	C11H21N3O4S2	336
1906	928	2-undecanone	171.174	153.164	C11H22O1	337
1907	929	2-carboxy-1,4-naphthoquinone	202.026	184.015	C11H5O4	338
1908	930	bergaptol	203.034	185.023	C11H6O4	339
1909	931	(indol-3-yl)pyruvate	203.058	185.047	C11H8N1O3	340
1910	932	2-succinylbenzoate	221.044	203.034	C11H8O5	341
1911	933	4-(indol-3-yl)butanoate	203.094	185.084	C12H12N1O2	342
1912	934	a 4-deoxy-α-L-erythro-hex-4-enopyranuronate-uronate disccharide	351.056	333.045	C12H14O12	343
1913	935	coniferyl acetate	223.096	205.086	C12H14O4	344
1914	936	thiamine phosphate	344.07	326.06	C12H16N4O4P1S1	345
1915	937	thiamine diphosphate	423.029	405.018	C12H16N4O7P2S1	346
1916	938	α-D-galacturonosyl-(1→4)-α-D-galacturonate	369.066	351.056	C12H16O13	347
1917	939	CDP-glycerol	476.047	458.036	C12H19N3O13P2	348
1918	940	4-pentenyl-glucosinolate	387.065	369.055	C12H20N1O9S2	349
1919	941	geranyl acetate	197.154	179.143	C12H20O2	350
1920	942	CDP-N-methylethanolamine	460.075	442.065	C12H21N4O11P2	351
1921	943	(E)-1-(L-cysteinylglycin-S-yl)-N-hydroxy-ω-(methylsulfanyl)hexan-1-imine	338.12	320.11	C12H23N3O4S2	352
1922	944	laurate	200.177	182.167	C12H23O2	353
1923	945	N1-acetylspermine	248.257	230.246	C12H31N4O1	354
1924	946	5-hydroxy-8-methoxypsoralen	233.044	215.034	C12H8O5	355
1925	947	a phenothiazine	200.053	182.042	C12H9N1S1	356
1926	948	2,6-dioxo-6-phenylhexa-3-enoate	218.057	200.047	C12H9O4	357
1927	949	3-hydroxy-5-methoxybiphenyl	201.091	183.08	C13H12O2	358
1928	950	(indol-3-yl)acetyl-L-alanine	246.1	228.089	C13H13N2O3	359
1929	951	5'-phosphoribosyl-4-(N-succinocarboxamide)-5-aminoimidazole	451.05	433.039	C13H15N4O12P1	360
1930	952	1-O-galloyl-β-D-glucose	333.082	315.071	C13H16O10	361
1931	953	(Z)-1-(L-cysteinyglycin-S-yl)-N-hydroxy-2-phenylethan-1-imine	312.101	294.091	C13H17N3O4S1	362
1932	954	N-caffeoylputrescine	252.147	234.136	C13H19N2O3	363
1933	955	(L-cysteinyl)adenylate	451.08	433.069	C13H19N6O8P1S1	364
1934	956	(R)-S-lactoylglutathione	379.104	361.094	C13H20N3O8S1	365
1935	957	β-ionone	193.159	175.148	C13H20O1	366
1936	958	3-hydroxy-β-ionone	209.154	191.143	C13H20O2	367
1937	959	5-(methylsulfinyl)pentyl-glucosinolate	451.064	433.053	C13H24N1O10S3	368
1938	960	D-galactosylononitol	357.139	339.129	C13H24O11	369
1939	961	(E)-1-(L-cysteinylglycin-S-yl)-N-hydroxy-ω-(methylsulfanyl)heptan-1-imine	352.136	334.125	C13H25N3O4S2	370
1940	962	2-tridecanone	199.206	181.195	C13H26O1	371
1941	963	bis-noryangonin	230.057	212.047	C13H9O4	372
1942	964	phenanthrene-ring	179.086	161.075	C14H10	373
1943	965	(indol-3-yl)acetyl-L-aspartate	289.082	271.071	C14H12N2O5	374
1944	966	(2-oxindol-3-yl)acetyl-L-aspartate	305.077	287.066	C14H12N2O6	375
1945	967	benzylbenzoate	213.091	195.08	C14H12O2	376
1946	968	trans-resveratrol	229.086	211.075	C14H12O3	377
1947	969	7,8-dihydropteroate	314.112	296.102	C14H13N6O3	378
1948	970	2-succinyl-5-enolpyruvoyl-6-hydroxy-3-cyclohexene-1-carboxylate	326.063	308.053	C14H13O9	379
1949	971	adenylo-succinate	460.05	442.039	C14H14N5O11P1	380
1950	972	demethylsuberosin	231.102	213.091	C14H14O3	381
1951	973	4,9-dimethyldodeca-2,4,6,8,10-pentaene-1,12-dial	217.122	199.112	C14H16O2	382
1952	974	dhurrin	312.108	294.097	C14H17N1O7	383
1953	975	DIBOA-β-D-glucoside	344.098	326.087	C14H17N1O9	384
1954	976	glucotropaeolin	409.05	391.039	C14H18N1O9S2	385
1955	977	deacetoxycephalosporin C	357.099	339.088	C14H18N3O6S1	386
1956	978	desulfoglucotropaeolin	330.101	312.09	C14H19N1O6S1	387
1957	979	penicillin N	359.115	341.104	C14H20N3O6S1	388
1958	980	2-(α-hydroxyethyl)thiamine diphosphate	467.055	449.044	C14H20N4O8P2S1	389
1959	981	salidroside	301.128	283.118	C14H20O7	390
1960	982	[4-(6-methyloctanoyl)-5-oxo-2H-furan-3-yl]methyl phosphate	333.11	315.099	C14H21O7P1	391
1961	983	2-phospho-4-(cytidine 5'-diphospho)-2-C-methyl-D-erythritol	598.023	580.013	C14H22N3O17P3	392
1962	984	4-(cytidine 5'-diphospho)-2-C-methyl-D-erythritol	520.073	502.062	C14H23N3O14P2	393
1963	985	[(3S)-4-(6-methyloctanoyl)-5-oxooxolan-3-yl]methyl phosphate	335.125	317.115	C14H23O7P1	394
1964	986	1-O-(2-acetamido-2-deoxy-α-D-glucopyranosyl)-1D-myo-inositol 3-phosphate	462.101	444.09	C14H24N1O14P1	395
1965	987	S-adenosyl 3-(methylsulfanyl)propylamine	357.17	339.16	C14H24N6O3S1	396
1966	988	CDP-choline	488.107	470.096	C14H25N4O11P2	397
1967	989	6-methylsulfinylhexyl-glucosinolate	465.079	447.069	C14H26N1O10S3	398
1968	990	6-(methylsulfanyl)hexyl-glucosinolate	449.084	431.074	C14H26N1O9S3	399
1969	991	N-acetyl-β-D-glucosaminyl-(1→4)-D-glucosamine	384.174	366.163	C14H27N2O10	400
1970	992	(E)-1-(L-cysteinylglycin-S-yl)-N-hydroxy-ω-(methylsulfanyl)octan-1-imine	366.152	348.141	C14H27N3O4S2	401
1971	993	an anthraquinone derivative	209.06	191.049	C14H8O2	402
1972	994	a 4'-hydroxyisoflavone	239.07	221.06	C15H10O3	403
1973	995	daidzein	255.065	237.055	C15H10O4	404
1974	996	baicalein	271.06	253.05	C15H10O5	405
1975	997	thyroxine	270.076	252.066	C15H11N1O4I4	406
1976	998	(+)-dihydromyricetin	320.053	302.042	C15H11O8	407
1977	999	(2S)-flavanone	225.091	207.08	C15H12O2	408
1978	1000	2-O-caffeoylglucarate	371.061	353.05	C15H14O11	409
1979	1001	(indol-3-yl)acetyl-L-glutamine	303.121	285.111	C15H16N3O4	410
1980	1002	(L-cysteinylglycin-S-yl)(1H-indol-3-yl)acetonitrile	333.102	315.091	C15H16N4O3S1	411
1981	1003	(indol-3-yl)acetyl-L-valine	274.131	256.121	C15H17N2O3	412
1982	1004	(indol-3-yl)acetyl-L-methionine	306.103	288.093	C15H17N2O3S1	413
1983	1005	(E)-1-(L-cysteinylglycin-S-yl)-N-hydroxy-2-(1H-indol-3-yl)ethan-1-imine	351.112	333.102	C15H18N4O4S1	414
1984	1006	DIMBOA-β-D-glucoside	374.108	356.098	C15H19N1O10	415
1985	1007	O-carbamoyl-deacetylcephalosporin C	416.1	398.089	C15H19N4O8S1	416
1986	1008	7-α-hydroxy-O-carbamoyl-deacetylcephalosporin C	432.095	414.084	C15H19N4O9S1	417
1987	1009	1-(5-phospho-β-D-ribosyl)-AMP	556.048	538.037	C15H19N5O14P2	418
1988	1010	S-adenosyl-4-methylsulfanyl-2-oxobutanoate	398.113	380.102	C15H19N5O6S1	419
1989	1011	malonyl-furaneol glucopyranoside	376.1	358.089	C15H19O11	420
1990	1012	N6-(Δ2-isopentenyl)-adenosine 5'-diphosphate	493.076	475.065	C15H20N5O10P2	421
1991	1013	trans-zeatin riboside diphosphate	509.071	491.06	C15H20N5O11P2	422
1992	1014	1-(5-phospho-β-D-ribosyl)-ATP	714.972	696.962	C15H20N5O20P4	423
1993	1015	N6-(Δ2-isopentenyl)-adenosine 5'-monophosphate	414.117	396.107	C15H20N5O7P1	424
1994	1016	UDP-α-D-sulfoquinovopyranose	628.001	609.99	C15H21N2O19P2S1	425
1995	1017	N6-(Δ2-isopentenyl)-adenosine 5'-triphosphate	573.042	555.032	C15H21N5O13P3	426
1996	1018	ADP-D-ribose	558.063	540.053	C15H21N5O14P2	427
1997	1019	trans-zeatin riboside triphosphate	589.037	571.027	C15H21N5O14P3	428
1998	1020	α-curcumene	203.179	185.169	C15H22	429
[truncated: 651 more rows]
